1 **Localized mRNA translation mediates maturation of cytoplasmic cilia in *Drosophila***  
2 **spermatogenesis**

3

4 Short Running title: mRNA localization in sperm cilia maturation

5

6 Jaclyn M Fingerhut<sup>1,2,\*</sup> and Yukiko M Yamashita<sup>1,2,3,4,\*</sup>

7

8 <sup>1</sup>Cellular and Molecular Biology Program, <sup>2</sup>Life Sciences Institute, <sup>3</sup>Department of Cell and  
9 Developmental Biology, <sup>4</sup>Howard Hughes Medical Institute, University of Michigan, Ann  
10 Arbor, MI 48109, USA

11

12 \* Correspondence: [jaclynmf@umich.edu](mailto:jaclynmf@umich.edu), [yukikomy@umich.edu](mailto:yukikomy@umich.edu)

13

14

15

16

17

18

19

20

21

22

23

24

25

26

27

28

29

30

31

## 32 **Abstract**

33           Cytoplasmic cilia, a specialized type of cilia in which the axoneme resides within the  
34 cytoplasm rather than within the ciliary compartment, are proposed to allow the efficient  
35 assembly of very long cilia. Despite being found diversely in male gametes (e.g. *Plasmodium*  
36 microgametocytes and human and *Drosophila* sperm), very little is known about cytoplasmic  
37 cilia assembly. Here we show that a novel RNP granule containing the mRNAs for axonemal  
38 dynein motor proteins becomes highly polarized to the distal end of the cilia during  
39 cytoplasmic ciliogenesis in *Drosophila* sperm. This allows for the localized translation of  
40 these axonemal dyneins and their incorporation into the axoneme directly from the  
41 cytoplasm. We found that this RNP granule contains the proteins Reptin and Pontin, loss of  
42 which perturbs granule formation and prevents incorporation of the axonemal dyneins,  
43 leading to sterility. We propose that cytoplasmic cilia require the local translation of key  
44 protein constituents such that these proteins are incorporated efficiently into the axoneme.

45

## 46 **Author Summary**

47           Cytoplasmic cilia, which are found in human and *Drosophila* sperm, are unique in that  
48 the axoneme is exposed to the cytoplasm. The authors show that a novel RNP granule  
49 containing axonemal dynein mRNAs facilitates localized translation of these axonemal  
50 proteins, facilitating cytoplasmic cilia formation.

51

## 52 **Abbreviations**

53 SC spermatocyte

54 IFT intraflagellar transport

55 ODA Outer dynein arm

56 IDA Inner dynein arm

57 RNP Ribonucleoprotein

58 smFISH single molecule RNA fluorescent in situ hybridization

59 IF Immunofluorescent

60 IC Individualization complex

61 TEM Transmission light microscopy

62

## 63 Introduction

64 Cilia are microtubule-based structures present on the surface of many cells. These  
65 specialized cellular compartments can be non-motile primary cilia that largely function in  
66 signaling, or motile cilia that can either move extracellular materials (e.g. lung multiciliated  
67 cells) or allow for cell motility (e.g. *Chlamydomonas* flagellum, sperm in many species)  
68 (Ishikawa and Marshall, 2011). It is well established that most cilia are separated from the  
69 bulk cytoplasm (Fig. 1 A), which serves to concentrate signaling molecules for rapid response  
70 to extracellular signals received by the cilia, and that the ciliary gate at the base of the cilia  
71 forms a diffusion barrier, through which molecules must be selectively transported (Reiter  
72 et al., 2012; Wheway et al., 2018). However, recent studies identified an additional type of  
73 cilia, called cytoplasmic cilia, in which the axoneme (the microtubule-based core of the cilia)  
74 is exposed to the cytoplasm (Fig. 1 A) (Avidor-Reiss et al., 2017; Avidor-Reiss and Leroux,  
75 2015; Dawson and House, 2010; Fawcett et al., 1970; Sinden et al., 1976; Tates, 1971;  
76 Tokuyasu, 1975). Cytoplasmic cilia are found in human and *Drosophila* sperm as well as in  
77 *Plasmodium* and *Giardia*. There are two proposed advantages to cytoplasmic cilia: 1) faster  
78 assembly as the cell does not need to rely on ciliary transport mechanisms, allowing for the  
79 assembly of longer cilia, and 2) proximity to mitochondria for energy (Avidor-Reiss and  
80 Leroux, 2015; Sinden et al., 2010). Despite being found across diverse taxa, very little is  
81 known about how cytoplasmic cilia are assembled and whether their assembly bears  
82 similarity to that of traditional compartmentalized cilia (Desai et al., 2018).

83 Cytoplasmic ciliogenesis has been proposed to occur in two stages (Fig. 1 A) (Avidor-  
84 Reiss and Leroux, 2015). In the first stage, microtubules are polymerized in a small  
85 compartmentalized region, which is similar to canonical compartmentalized cilia, at the  
86 most distal end of the cilia (Gottardo et al., 2013; Tokuyasu, 1975). This region is gated by a  
87 transition zone (Caudron and Barral, 2009; Kwitny et al., 2010; Vieillard et al., 2016). This  
88 entire compartmentalized region, called the ciliary cap or the growing end, migrates away  
89 from the basal body, which is docked at the nuclear membrane (Basiri et al., 2014; Fawcett  
90 et al., 1970). The ciliary cap does not change in size as the cilia elongates. The continued  
91 polymerization of microtubules inside the ciliary cap displaces recently synthesized  
92 microtubules out of the compartmentalized region, exposing them to the cytoplasm (Fig. 1  
93 A). The second stage is axoneme maturation, in which additional axonemal proteins (e.g.

94 axonemal dyneins, the motor proteins that confer motility by allowing axonemal  
95 microtubules to slide against each other, Fig. 1 B) are added to the bare microtubule  
96 structure after it emerges from the ciliary cap (Tates, 1971; Tokuyasu, 1975). Axoneme  
97 maturation was inferred to occur in the cytoplasm based on the dispensability of ciliary  
98 transport mechanisms and the inefficiency of relaying on diffusion through the transition  
99 zone (Avidor-Reiss and Leroux, 2015; Breslow et al., 2013; Briggs et al., 2004; Han et al.,  
100 2003; Hoeng et al., 2008; Kee et al., 2012; Lin et al., 2013; Sarpal et al., 2003). However, how  
101 this maturation process occurs in the cytoplasmic compartment to allow for cytoplasmic cilia  
102 formation remains unknown.

103 *Drosophila* spermatogenesis provides an excellent model for the study of cytoplasmic  
104 ciliogenesis (Fig. 1 B), owing to rich cytological knowledge of spermatogenesis and the  
105 conservation of almost all known ciliary proteins (Zur Lage et al., 2019). Developing  
106 spermatids elongate from 15 $\mu$ m to 1,900 $\mu$ m (1.9mm) (Tates, 1971; Tokuyasu, 1975). Within  
107 mature sperm, the cytoplasmic cilia are 1,800 $\mu$ m and the ciliary caps (the  
108 compartmentalized region) are only  $\sim$ 2 $\mu$ m. Ciliogenesis starts in premeiotic spermatocytes  
109 (SCs), which assemble short primary (compartmentalized) cilia (Fabian and Brill, 2012;  
110 Gottardo et al., 2013; Riparbelli et al., 2012; Tates, 1971). Prior to axoneme elongation, these  
111 primary cilia, which were docked at the plasma membrane in SCs, invaginate, forming the  
112 ciliary cap. During axoneme elongation, the majority of the length of the cilia will be exposed  
113 to the cytoplasm, as described above. Accordingly, axoneme assembly in *Drosophila* does not  
114 require intraflagellar transport (IFT) (Han et al., 2003; Sarpal et al., 2003), the process used  
115 by traditional compartmentalized cilia to ferry axonemal proteins from the cytoplasm into  
116 the ciliary compartment for incorporation (Rosenbaum and Witman, 2002). Other  
117 cytoplasmic cilia have been found not to require IFT for their assembly (Avidor-Reiss and  
118 Leroux, 2015; Briggs et al., 2004; Hoeng et al., 2008), leading to the appreciation of a distinct  
119 type of cilia: based on the dispensability of IFT, it was postulated that axoneme maturation  
120 must occur in the cytoplasm, hence the term 'cytoplasmic cilia'.

121 It has long been known that SCs transcribe almost all genes whose protein products  
122 are needed post-meiotically and that these mRNAs may not be translated until days later  
123 when proteins are needed (Barckmann et al., 2013; Olivieri and Olivieri, 1965). We  
124 previously showed that the Y-linked testis-specific axonemal dynein heavy chain genes *kl-3*

125 and *kl-5*, as well as the testis-specific axonemal dynein intermediate chain *Dic61B*, are  
126 transcribed in SCs (Fingerhut et al., 2019). However, axoneme elongation does not begin  
127 until after meiosis, suggesting that these mRNAs may not be translated until later in  
128 development. Intriguingly, we previously showed that *kl-3* and *kl-5* mRNAs localize to  
129 cytoplasmic granules in SCs. Ribonucleoprotein (RNP) granules (e.g. stress granules, P  
130 granules and germ granules) are known to play critical roles in mRNA regulation, such as  
131 mediating the subcellular localization of mRNAs and controlling the timing of translation  
132 (Anderson and Kedersha, 2009; Buchan, 2014; Medioni et al., 2012). Therefore, we decided  
133 to investigate the role of this novel RNA granule in the translational regulatory mechanisms  
134 that ensure proper axoneme assembly and found that it plays an essential role in the  
135 incorporation of axonemal proteins, providing the first insights into the molecular  
136 mechanism of cytoplasmic cilia maturation. We show four axonemal dynein heavy chain  
137 mRNAs, including *kl-3* and *kl-5*, colocalize in these novel granules in late SCs along with the  
138 AAA+ (ATPases Associated with diverse cellular Activities) proteins Reptin (Rept) and  
139 Pontin (Pont). These RNP granules are segregated during the meiotic divisions and localize  
140 to the distal end of the cytoplasmic compartment as the axoneme elongates during  
141 spermiogenesis. We further show that Rept and Pont are required for RNP granule  
142 formation, and that RNP granule formation is necessary for robust translation and  
143 incorporation of the axonemal dynein proteins into the axoneme. We propose that  
144 cytoplasmic cilia maturation relies on the local translation of axonemal components such  
145 that they can be incorporated into the bare microtubule structure as it emerges from the  
146 ciliary cap.

147

## 148 **Results**

### 149 **Axonemal dynein heavy chain mRNAs colocalize in RNP granules in spermatocytes**

150 In our previous study, we analyzed the expression of the Y-linked axonemal dynein  
151 genes *kl-3* and *kl-5* and showed that these two mRNAs localized to cytoplasmic granules in  
152 late SCs (Fingerhut et al., 2019). Using single molecule RNA fluorescent *in situ* hybridization  
153 (smFISH), we found that mRNAs for four testis-specific axonemal dynein heavy chain genes  
154 (the Y-chromosome genes *kl-2*, *kl-3*, and *kl-5*, as well as the autosomal gene *Dhc98D*  
155 (Carvalho et al., 2000; Goldstein et al., 1982; Hardy et al., 1981; Zur Lage et al., 2019))

156 colocalize together within RNP granules in the cytoplasm of late SCs, with each SC containing  
157 several of these cytoplasmic granules (Fig. 1 C and D). We termed these granules “kl-  
158 granules” after the three Y-linked constituent mRNAs. It should be noted that robust  
159 transcription of these genes is still ongoing in SC nuclei (visible as bright nuclear signal, Fig.  
160 1 C and D) but these are nascent transcripts that still contain intronic RNA, whereas the kl-  
161 granules in the cytoplasm do not contain intronic RNA, as we showed previously (Fingerhut  
162 et al., 2019). The present study focuses the fate of these cytoplasmic RNPs that contain  
163 mature mRNA. mRNAs within a kl-granule are spatially sub-organized: *kl-3* and *kl-5* mRNAs,  
164 which encode outer dynein arm (ODA) dynein heavy chain proteins, cluster together in the  
165 core of the kl-granule while *kl-2* and *Dhc98D* mRNAs, which encode inner dynein arm (IDA)  
166 dynein heavy chain proteins, localize peripherally (Fig. 1 E – G). This is similar to the sub-  
167 compartmentalization observed in other RNP granules, including the germ granules in the  
168 *Drosophila* ovary, stress granules, P granules and nucleoli (Boisvert et al., 2007; Jain et al.,  
169 2016; Trcek et al., 2015; Wang et al., 2014). We noted that kl-granule formation is unlikely  
170 to be dependent upon any one mRNA constituent as RNAi mediated knockdown of *kl-3*, *kl-5*,  
171 *kl-2*, or *Dhc98D* (*bam-gal4>UAS-kl-3<sup>TRiP.HMC03546</sup>* or *bam-gal4>UAS-kl-5<sup>TRiP.HMC03747</sup>* or *bam-*  
172 *gal4>UAS-kl-2<sup>GC8807</sup>* or *bam-gal4>UAS-Dhc98D<sup>TRiP.HMC06494</sup>*) did not perturb granule formation  
173 despite efficient knockdown (Fig. S1).

174 We conclude that mRNAs for the testis-specific axonemal dynein heavy chains  
175 localize to novel RNP granules, which we termed kl-granules, in late SCs.

176

### 177 **The kl-granules segregate during the meiotic divisions and localize to the distal end** 178 **of elongating spermatids**

179 As the kl-granules contain mRNAs for axonemal proteins that are only necessary for  
180 spermiogenesis, we next followed the fate of the kl-granules through meiosis and into  
181 spermiogenesis. The kl-granules segregate through the two sequential meiotic divisions (Fig.  
182 2 A) such that each resulting haploid spermatid receives a relatively equal amount of kl-  
183 granule (Fig. 2 B). Upon completion of meiosis, the resultant spermatids are interconnected  
184 due to incomplete cytokinesis during the four mitotic divisions that occur early in germ cell  
185 development and the two meiotic divisions, forming a cyst of 64 spermatids (Fuller, 1993;  
186 Hime et al., 1996). As the axoneme starts to elongate within each spermatid, the nuclei

187 cluster to the proximal end of the cyst while the axoneme elongates unidirectionally away  
188 from the nuclei with the ciliary caps clustered at the distal end of the cyst (Fig. 1 B) (Fabian  
189 and Brill, 2012). Strikingly, we found that the kl-granules become localized to the distal end  
190 of elongating spermatid cysts (Fig. 2 C). This polarized localization remains as the axoneme  
191 continues to elongate (Fig. 2 D and E). At later stages of elongation, the kl-granules begin to  
192 dissociate and the mRNAs become more diffusely localized at the distal end (Fig. 2 D and E).  
193 Interestingly, some mRNAs dissociate from the kl-granules before others: *kl-3* and *kl-5*  
194 mRNAs (encoding ODA proteins) dissociate earlier than *kl-2* and *Dhc98D* mRNAs (encoding  
195 IDA proteins) (Fig. 2 D and F). It is of note that the differential timing of dissociation  
196 correlates with the sub-compartmentalization of constituent mRNAs described above: *kl-3*  
197 and *kl-5* localize to the core of the kl-granules and dissociate first (Fig. 1 E), whereas *kl-2* and  
198 *Dhc98D* localize to the periphery of the kl-granules (Fig. 1 F) and dissociate later. These  
199 results show that kl-granules exhibit stereotypical localization to the growing end of  
200 spermatids after being segregated during meiosis, implying that programmed positioning of  
201 the kl-granules may play an important role during spermatid elongation and axoneme  
202 maturation.

203

### 204 **The AAA+ proteins Reptin and Pontin colocalize with the kl-granules**

205 To further understand how kl-granules form and their potential function, we sought  
206 to identify a protein(s) that localize to the kl-granules. In our previous study, we screened  
207 for proteins involved in the expression of the Y-linked axonemal dynein genes (Fingerhut et  
208 al., 2019). Reptin (Rept) and Pontin (Pont), two AAA+ proteins (Puchades et al., 2020), were  
209 included in this screen because of their high expression in the testis and their involvement  
210 in RNP complex formation in other systems (Mao and Houry, 2017; Robinson et al., 2013).  
211 Also, studies in *Drosophila*, mouse, zebrafish, *Chlamydomonas* and *Xenopus* have specifically  
212 implicated Rept and Pont in axoneme/motile cilia assembly and/or sperm motility, although  
213 the underlying mechanism remains unknown (Dafinger et al., 2018; Huizar et al., 2018; Li et  
214 al., 2017; Stolc et al., 2005; Tammana and Tammana, 2017; Zhao et al., 2013; Zur Lage et al.,  
215 2018).

216 We found that Rept and Pont colocalize in cytoplasmic granules in SCs through  
217 elongating spermatids (Fig. 3 A and B). Immunofluorescent staining combined with smFISH

218 (IF-smFISH) showed that Rept and Pont colocalize with the kl-granules. Pont first colocalizes  
219 with *Dhc98D* mRNA in early SCs (Fig. 3 C) and with all other kl-granule constituent mRNAs  
220 in later SCs (Fig. 3 D) and throughout spermatid elongation (Fig. 3 E). Close examination of  
221 the kl-granules in late SCs revealed that Pont is not evenly distributed within a kl-granule  
222 and rather concentrates near the core with *kl-3* and *kl-5* mRNAs (Fig. 1 E and Fig. 3 F). In  
223 contrast, *kl-2* and *Dhc98D* mRNAs occupy the periphery of the kl-granule (Fig. 1 F), where  
224 Pont is less concentrated.

225 We conclude that Rept and Pont localize to the kl-granules together with axonemal  
226 dynein heavy chain mRNAs. It is interesting to note that previous studies have proposed that  
227 Rept and Pont function as chaperones in the assembly of axonemal dynein motors  
228 (complexes containing a combination of dynein heavy, intermediate, and light chains)  
229 (Huizar et al., 2018; Li et al., 2017; Zur Lage et al., 2018). It remains unknown whether  
230 previously reported Rept- and Pont-containing chaperon complexes also contain mRNA (see  
231 Discussion).

232

### 233 **Reptin and Pontin are required for kl-granule assembly**

234 To explore the function of Rept and Pont in kl-granule formation, we performed RNAi  
235 mediated knockdown of either *rept* or *pont* (*bam-gal4>UAS-rept<sup>KK105732</sup>* or *bam-gal4>UAS-*  
236 *pont<sup>KK101103</sup>*). In addition to eliminating the targeted protein, depletion of *rept* resulted in loss  
237 of Pont and vice versa, reminiscent of findings from previous studies, likely because these  
238 proteins stabilize each other as components of the same complex (Fig. S2) (Gorynia et al.,  
239 2011; Li et al., 2017; Rivera-Calzada et al., 2017; Venteicher et al., 2008).

240 We next determined whether Rept and Pont are needed for kl-granule assembly.  
241 Indeed, knockdown of *rept* or *pont* resulted in disruption of the kl-granules. smFISH clearly  
242 detected the presence of dispersed *kl-3* and *kl-5* mRNAs in late SCs, suggesting that *rept* and  
243 *pont* are required for kl-granule formation but not for the stability of the constituent mRNAs  
244 (Fig. 4 A – C, note that nuclear signal was oversaturated in order to focus on the dispersed  
245 cytoplasmic signal). This effect was more pronounced in elongating spermatids where *kl-3*  
246 and *kl-5* mRNAs were diffuse throughout the entire cyst in the RNAi conditions (Fig. 4 D – F).  
247 RT-qPCR confirmed that mRNA levels were not reduced compared to cross-sibling controls  
248 (Fig. 4 G and H), demonstrating that kl-granule formation is not required for mRNA stability.



249 This is in accordance with observations in other systems that suggest that RNA granule  
250 formation is not required for mRNA stability and may be more important for mRNA  
251 localization or translation (Bley et al., 2015; Lee et al., 2020).

252 Interestingly, knockdown of *rept* or *pont* had a somewhat different effect on *kl-2* and  
253 *Dhc98D* mRNAs. smFISH for *kl-2* and *Dhc98D* following RNAi of either *rept* or *pont* showed  
254 loss of kl-granule localization in late SCs similar to that seen for *kl-3* and *kl-5* (Fig. 4 I – K).  
255 However, in elongating spermatids, *kl-2* and *Dhc98D* mRNAs appeared to localize properly  
256 at the distal end of the cyst (Fig. 4 L – N). Considering that Pont primarily colocalized with  
257 *kl-3* and *kl-5* mRNAs (Fig. 3 F), this may suggest that other proteins participate in localizing  
258 *kl-2* and *Dhc98D* mRNAs to the kl-granule.

259 In conclusion, Rept and Pont are critical for assembling the kl-granules.

260

### 261 **kl-granule assembly is required for efficient Kl-3 translation and sperm motility**

262 Previous studies in *Drosophila* and mouse demonstrated that Rept and Pont are  
263 required for male fertility (Li et al., 2017; Zur Lage et al., 2018). We confirmed that seminal  
264 vesicles, where mature motile sperm are stored after exiting the testis, were empty in *rept*  
265 or *pont* RNAi testes (Fig. 5 A – C), as was observed for *kl-3*, *kl-5*, *kl-2*, or *Dhc98D* RNAi testes  
266 (Fig. S3) (Fingerhut et al., 2019; Zur Lage et al., 2018).

267 We further characterized the sterility phenotype of *rept* and *pont* RNAi testes and  
268 found that spermiogenesis fails during individualization. As sperm develop as cysts, the  
269 process of individualization removes excess cytoplasm from the spermatids and separates  
270 the cyst into individual sperm via actin-rich individualization complexes (ICs) (Fabian and  
271 Brill, 2012). The ICs form around the nuclei at the proximal end of the cyst and progress  
272 evenly towards the distal end (Fig. 5 D). It is well established that defects in axoneme  
273 assembly, including loss of axonemal dynein motor proteins, perturb IC progression (Fatima,  
274 2011; Fingerhut et al., 2019; Wang et al., 2019). We found that RNAi-mediated knockdown  
275 of *rept* or *pont*, does not affect IC assembly but does result in disorganized IC progression  
276 (Fig. 5 E – J), as is observed following knockdown of *kl-3*, *kl-5*, *kl-2*, or *Dhc98D* (Fig. S3)  
277 (Fingerhut et al., 2019).

278 As previous studies have implicated Rept and Pont in male fertility and axonemal  
279 dynein motor assembly, and the observed individualization defects are characteristic of

280 axonemal defects, we analyzed Kl-3 protein levels following *rept* or *pont* RNAi. Western  
281 blotting using total testis extracts revealed that Kl-3 protein levels are drastically reduced  
282 following knockdown of *rept* or *pont* (Fig. 5 K). Taken together, our results demonstrate that  
283 Rept and Pont are required for mRNAs to congress in the kl-granule, which in turn is  
284 required for efficient translation. This defect in axonemal dynein expression is the likely  
285 cause of sterility in *rept* and *pont* RNAi testes.

286

### 287 **kl-granule formation and localization are required for cytoplasmic cilia maturation**

288 Precise mRNA localization and localized translation are widely utilized mechanisms  
289 to ensure that proteins are concentrated where they are needed (Glock et al., 2017; Medioni  
290 et al., 2012). As described above, the kl-granules localize to the distal end of elongating  
291 spermatids (Fig. 2) where bare axonemal microtubules are first exposed to the cytoplasm  
292 after being displaced from the ciliary cap as new microtubules are polymerized. We  
293 therefore postulated that the kl-granule may function in cytoplasmic cilia maturation. We  
294 first determined whether the kl-granules localize within the ciliary cap or within the  
295 cytoplasmic compartment. By using Unc-GFP to mark the ring centriole, a structure at the  
296 base of the ciliary cap at the boundary between the cytoplasmic and compartmentalized  
297 regions (Baker et al., 2004; Phillips, 1970), we found that the kl-granules are located within  
298 the cytoplasmic compartment, immediately proximal to the ciliary cap (Fig. 6 A), suggesting  
299 that this may be the site of localized Kl-3 translation. Indeed, we not only found that FLAG-  
300 tagged Kl-3 protein (expressed from the endogenous locus, see Methods) occupies the same  
301 region proximal to the ciliary cap as the kl-granules but that Kl-3 protein is restricted to the  
302 cytoplasmic compartment while the microtubules extend into the compartmentalized  
303 compartment (i.e. the ciliary cap) (Fig. 6 B). These results indicate that while the axonemal  
304 microtubules are polymerized within the ciliary cap, axoneme maturation (the incorporation  
305 of axonemal dyneins and other axonemal proteins) may occur within the cytoplasmic  
306 compartment, as has been proposed (Avidor-Reiss and Leroux, 2015).

307 Detailed examination of Kl-3 protein within the elongating spermatid cysts provided  
308 insights into where Kl-3 protein may be translated and incorporated into the growing  
309 axoneme (Fig. 6 C and D). At the distal end of the cyst, where the kl-granules are  
310 concentrated, Kl-3 protein was predominantly observed in the cytoplasm, while being

311 excluded from the axonemal microtubules (Fig. 6D, see the right panel for intensity plot  
312 showing mutually exclusive localization of microtubules and Kl-3). This suggests that Kl-3  
313 protein at the distal end may represent the pool of newly translated Kl-3 before it is  
314 incorporated into the axoneme, which is also consistent with the presence of kl-granules at  
315 this location. In contrast to the distal end, Kl-3 protein was observed to colocalize with  
316 axonemal microtubules at the proximal end (Fig. 6D, see the right panel for intensity plot  
317 showing colocalization of microtubules and Kl-3), suggesting that Kl-3 protein has been  
318 successfully incorporated into the axoneme. These results suggest that Kl-3 protein is  
319 translated at the distal end, where the kl-granules localize, and that the diffuse cytoplasmic  
320 Kl-3 protein is the newly synthesized pool, which is subsequently incorporated into the  
321 axoneme.

322 Following RNAi mediated knockdown of *rept* or *pont*, which prevents kl-granule  
323 formation (Fig. 4) and drastically reduces Kl-3 protein levels (Fig. 5 K), we still observed Kl-  
324 3 protein in the cytoplasm at the distal end (Fig. 6 F and H), although at a much reduced level.  
325 However, Kl-3 protein was never observed to colocalize with the axonemal microtubules at  
326 the proximal end upon *rept* or *pont* RNAi (Fig. 6 E and G), suggesting that Rept and Pont are  
327 required for incorporation of Kl-3 into the axoneme.

328 Consistent with this notion, transmission electron microscopy (TEM) revealed that  
329 the ODAs and IDAs are largely absent from the axonemes following *rept* or *pont* RNAi. (Fig.  
330 6 I – K). Additional gross axonemal defects (e.g. broken axonemes) were present in the RNAi  
331 conditions (Fig. 6 L – N), suggesting additional impairments to axoneme assembly. These  
332 results suggest that localized mRNA translation via formation of the kl-granules is required  
333 for axonemal dynein motor proteins to incorporate into the axoneme.

334

## 335 Discussion

336 Cytoplasmic cilia have been found in organisms as diverse as *Plasmodium* and  
337 humans (Avidor-Reiss et al., 2017; Avidor-Reiss and Leroux, 2015; Dawson and House, 2010;  
338 Fawcett et al., 1970; Sinden et al., 1976; Tates, 1971; Tokuyasu, 1975). While it has been  
339 proposed that axoneme maturation proceeds through the direct incorporation of axonemal  
340 proteins from the cytoplasm, this model remained untested (Avidor-Reiss and Leroux,  
341 2015). Our study provides the first insights into the mechanism of cytoplasmic cilia

342 formation. Our results show that localized translation of axonemal dynein mRNAs facilitates  
343 the maturation of cytoplasmic cilia by allowing for the efficient incorporation of axonemal  
344 dynein proteins into bare axonemal microtubules directly from the cytoplasm.

345

### 346 **Mechanism for cytoplasmic cilia maturation**

347 It has been proposed that cytoplasmic cilia assemble in two steps (Avidor-Reiss and  
348 Leroux, 2015): first, microtubules are polymerized within a small compartmentalized region  
349 of the cilia, then, as the bare microtubules are displaced from this region, axonemal proteins  
350 are incorporated directly from the cytoplasm during the maturation step. Previous studies  
351 that have shown that IFT, the process used by traditional compartmentalized cilia to ferry  
352 axonemal proteins into the ciliary compartment, is dispensable for *Drosophila*  
353 spermiogenesis, and that the genomes of some other organisms known to form cytoplasmic  
354 cilia (e.g. *Plasmodium*) do not encode IFT and/or transition zone proteins (Avidor-Reiss and  
355 Leroux, 2015; Breslow et al., 2013; Briggs et al., 2004; Han et al., 2003; Hoeng et al., 2008;  
356 Kee et al., 2012; Lin et al., 2013; Sarpal et al., 2003). These studies led to the notion that  
357 maturation of cytoplasmic cilia ought to happen in the cytoplasm, although direct evidence  
358 has been lacking.

359 Our study, which identified a novel RNP granule, the kl-granule, composed of  
360 axonemal dynein heavy chain mRNAs and the proteins Rept and Pont, provides the first  
361 molecular insights into cytoplasmic cilia maturation. Our results show that axonemal dynein  
362 heavy chain mRNAs (*kl-3*, *kl-5*, *kl-2*, and *Dhc98D*) congress into kl-granules in SCs. We further  
363 show that Rept and Pont are required for kl-granule assembly and the proper translation of  
364 axonemal dynein mRNAs. We demonstrate that the polarized localization of kl-granule  
365 mRNAs within the cytoplasmic compartment promotes localized translation and allows for  
366 the incorporation of their encoded proteins into the axoneme, facilitating the maturation  
367 step in cytoplasmic cilia assembly (Fig. 7). Our results refine the proposed two step model  
368 for cytoplasmic cilia assembly by demonstrating that concentrating axonemal proteins  
369 within distal regions of the cytoplasm is critical for maturation. Thus, axoneme maturation  
370 proceeds in a stepwise fashion, allowing for the efficient assembly of this very long cilia. This  
371 model implies that the proximal region of the axoneme should be more mature than the  
372 distal region, a notion that is supported by previous studies that looked at axoneme

373 ultrastructure and tubulin dynamics within the axoneme (Noguchi et al., 2011; Sinden et al.,  
374 2010; Tokuyasu, 1975).

375

### 376 **Function of Reptin and Pontin in dynein assembly**

377 A wide range of functions have been assigned to Rept- and Pont-containing complexes  
378 including roles in chromatin remodeling, transcription regulation, DNA repair and ribosome  
379 assembly (Mao and Houry, 2017). They can act alone, together or as part of larger complexes  
380 (Huen et al., 2010; Kakihara and Saeki, 2014). Among these, previous studies have proposed  
381 that Rept and Pont are dynein arm preassembly factors – chaperones that take individual  
382 dynein motor subunits (i.e. the heavy, intermediate, and light chain proteins) and stabilize  
383 and assemble them into a motor unit in the cytoplasm that is then ferried into the cilia for  
384 incorporation (Desai et al., 2018; Fabczak and Osinka, 2019; Fowkes and Mitchell, 1998).  
385 These assembly factors include R2TP and R2TP-like complexes (which include Rept  
386 (RUVBL2) and Pont (RUVBL1)) in association with dynein axonemal assembly factors  
387 (DNAAFs) (Fabczak and Osinka, 2019). While previous studies have clearly demonstrated  
388 that Rept, Pont, R2TP, and DNAAFs are needed for axonemal dynein protein stability and  
389 incorporation (Huizar et al., 2018; Li et al., 2017; Liu et al., 2019; Yamaguchi et al., 2018; Zhao  
390 et al., 2013; Zur Lage et al., 2018), our study is the first to demonstrate involvement of  
391 axonemal dynein mRNAs with these complexes, showing that Rept and Pont are required for  
392 axonemal dynein mRNAs to localize to the kl-granules. It remains unknown whether the  
393 Rept- and Pont-associated dynein arm preassembly complexes reported in previous studies  
394 also contain dynein mRNAs. However, important differences exist between these  
395 preassembly complexes and the kl-granules. Firstly, while *kl-3* mRNA is present in the kl-  
396 granules, no puncta are observed for Kl-3 protein, indicating that Kl-3 protein does not  
397 concentrate within the kl-granules (or another granule) as dyneins do in the dynein  
398 preassembly complexes reported in other systems (Dafinger et al., 2018; Huizar et al., 2018).  
399 Additionally, dynein preassembly complexes were found to contain proteins (e.g. Wdr78  
400 (Huizar et al., 2018)), where the *Drosophila* homolog (*Dic61B*) mRNAs are not constituents  
401 of the kl-granules (Fig. S4, see below). Therefore, the kl-granule may be a novel adaptation  
402 of a Rept and Pont containing dynein arm assembly complex specifically found in  
403 cytoplasmic cilia and is distinct from its role as a dynein preassembly factor in other systems.

404 It is likely that additional protein components of the kl-granule remain to be  
405 discovered. Structural analyses in previous studies have identified mechanisms by which  
406 other proteins interact with Rept and Pont (Rivera-Calzada et al., 2017), however, Rept and  
407 Pont do not have any RNA binding domains (Mao and Houry, 2017). Therefore, it is likely  
408 that additional proteins, not Rept and Pont themselves, physically interact with constituent  
409 mRNAs for kl-granule formation. Our data also supports the existence of additional proteins  
410 governing kl-granule dynamics. For example, as spermatids elongate, the ODA and IDA  
411 mRNAs separate slightly from each other while remaining polarized at the distal end (Fig. 2).  
412 Moreover, in the absence of Rept and Pont, the IDA mRNAs are still able to congress at the  
413 distal end of the elongating spermatid cyst, after failing to form kl-granules in SCs. In  
414 contrast, localization of the ODA mRNAs entirely depends on Rept and Pont, as ODA mRNAs  
415 remain diffuse throughout spermatogenesis following *rept* or *pont* RNAi. Finally, Pont more  
416 strongly colocalizes with the ODA mRNAs within the kl-granule (Fig. 3 F), which altogether  
417 suggests that there are additional proteins that can sort and specify the fate of these kl-  
418 granule mRNAs both alongside or in the absence of Rept and Pont. The identity of these  
419 additional proteins is the subject of further study. In addition, determining the involvement  
420 of the other dynein arm preassembly factors is of particular interest, especially considering  
421 the existence of multiple dynein arm assembly complexes that have been shown to  
422 differentially regulate IDA and ODA assembly (Fabczak and Osinka, 2019; Yamaguchi et al.,  
423 2018). It is also appealing to posit the existence of testis-specific factors which may help to  
424 distinguish the role of Rept and Pont in cytoplasmic cilia formation from its role in the  
425 assembly of other cellular bodies.

426

### 427 **Purpose of mRNA localization to kl-granules**

428 Interestingly, we found that not all mRNAs for axonemal/spermiogenesis proteins  
429 localize to the kl-granules (Fig. S4). mRNAs for other axonemal proteins (the dynein  
430 intermediate chain *Dic61B*, the dynein heavy chain *CG3339*, and the ODA docking complex  
431 component *CG17083* (Zur Lage et al., 2019)) as well as mRNAs for other Y-linked transcripts  
432 (*CCY* and *PPR-Y* (Carvalho et al., 2001)) and a non-axonemal spermatid protein (*fzo* (Hales  
433 and Fuller, 1997)) did not localize to the kl-granules. Instead they remain evenly distributed  
434 throughout the SC cytoplasm, despite also being important for sperm maturation (Fig. S4).

435 Additionally, we previously reported that mRNAs for the Y-liked gene *ORY* also gather in  
436 cytoplasmic RNA granules in late SCs (Fingerhut et al., 2019), however, these RNA granules  
437 are distinct from the kl-granule (Fig. S4 G).

438 In particular, it is intriguing that mRNA for *Dic61B*, an IDA intermediate chain that  
439 needs to bind to the IDA heavy chains Kl-2 and Dhc98D, is located differently (diffusely)  
440 within the spermatid cyst. Dynein preassembly is believed to be important for dynein  
441 protein stability and a prerequisite for axonemal incorporation (Fabczak and Osinka, 2019;  
442 Fowkes and Mitchell, 1998). An intriguing possibility is that temporal/spatial regulation of  
443 dynein mRNAs plays a role in helping the ordered assembly of dynein complexes. It will be  
444 of future interest to determine when and where during spermiogenesis dynein complexes  
445 are formed in the cytoplasmic cilia as well as what factors are necessary for their formation.  
446 A comprehensive understanding of kl-granule mRNAs and proteins would allow for further  
447 study into this temporal/spatial regulatory mechanism and a more thorough understanding  
448 of how the kl-granules function in the maturation of cytoplasmic cilia.

449

450 In summary, our study provides the first insights into the mechanism of cytoplasmic  
451 cilia maturation: mRNAs for axonemal dynein motor proteins are localized at the distal end  
452 of the axoneme within the cytoplasmic compartment, which allows for efficient maturation  
453 of cytoplasmic cilia through localized translation.

454

## 455 **Materials and Methods**

### 456 **Fly husbandry**

457 All fly stocks were raised on standard Bloomington medium at 25°C, and young flies  
458 (1- to 5-day-old adults) were used for all experiments. Flies used for wildtype experiments  
459 were the standard lab wildtype strain *yw* (*y<sup>1</sup>w<sup>1</sup>*). The following fly stocks were used: *bam-*  
460 *GAL4:VP16* (BDSC:80579), *UAS-kl-3<sup>TRiP.HMC03546</sup>* (BDSC:53317), *UAS-kl-5<sup>TRiP.HMC03747</sup>*  
461 (BDSC:55609), *UAS-Dhc98D<sup>TRiP.HMC06494</sup>* (BDSC:77181), and C(1)RM/C(1;Y)6, *y<sup>1</sup>w<sup>1</sup>fl/0*  
462 (BDSC:9460) were obtained from the Bloomington Stock Center (BDSC). *UAS-kl-2<sup>GC8807</sup>*  
463 (VDRC:v19181), *UAS-rept<sup>KK105732</sup>* (VDRC:v103483), and *UAS-pont<sup>KK101103</sup>* (VDRC:v105408)  
464 were obtained from the Vienna *Drosophila* Resource Center (VDRC). *unc-GFP* (GFP-tagged  
465 *unc* expressed by the endogenous promoter) and Ub- $\alpha$ -tubulin84B-GFP were a gift of

466 Cayentano Gonzalez (Baker et al., 2004; Rebollo et al., 2004) and *bam-gal4* was a gift of  
467 Dennis McKearin (Chen and McKearin, 2003). The *kl-3-FLAG* strain was constructed using  
468 CRISPR mediated knock-in of a 3X-FLAG tag at the C-terminus of *kl-3* as previously described  
469 (Fingerhut et al., 2019).

470

### 471 **Single molecule RNA fluorescent *in situ* hybridization**

472 All solutions used for RNA FISH were RNase free. Testes from 2-3 day old flies were  
473 dissected in 1X PBS and fixed in 4% formaldehyde in 1X PBS for 30 minutes. Then testes  
474 were washed briefly in 1X PBS and permeabilized in 70% ethanol overnight at 4°C. Testes  
475 were briefly rinsed with wash buffer (2X saline-sodium citrate (SSC), 10% formamide) and  
476 then hybridized overnight at 37°C in hybridization buffer (2X SSC, 10% dextran sulfate  
477 (Sigma, D8906), 1mg/mL E. coli tRNA (Sigma, R8759), 2mM Vanadyl Ribonucleoside  
478 complex (NEB S142), 0.5% bovine serum albumin (BSA, Ambion, AM2618), 10%  
479 formamide). Following hybridization, samples were washed three times in wash buffer for  
480 20 minutes each at 37°C and mounted in VECTASHIELD with DAPI (Vector Labs). Images  
481 were acquired using an upright Leica TCS SP8 confocal microscope with a 63X oil immersion  
482 objective lens (NA = 1.4) and processed using Adobe Photoshop and ImageJ software.

483 Fluorescently labeled probes were added to the hybridization buffer to a final concentration  
484 of 100nM. Probes against *kl-3*, *kl-5*, *kl-2*, *Dhc98D*, *CG3339*, *Dic61B*, *CG17083*, *CCY*, *PPR-Y*, *ORY*  
485 and *fzo* mRNAs were designed using the Stellaris® RNA FISH Probe Designer (Biosearch  
486 Technologies, Inc.) available online at [www.biosearchtech.com/stellarisdesigner](http://www.biosearchtech.com/stellarisdesigner). Each set of  
487 custom Stellaris® RNA FISH probes was labeled with Quasar 670, Quasar 570 or Fluorescein  
488 (Table S1).

489 For strains expressing GFP (e.g. unc-GFP or Ub- $\alpha$ -tubulin84B-GFP), the overnight  
490 permeabilization in 70% ethanol was omitted.

491

### 492 **Immunofluorescence staining**

493 Testes were dissected in 1X PBS, transferred to 4% formaldehyde in 1X PBS and fixed  
494 for 30 minutes. Testes were then washed in 1X PBST (PBS containing 0.1% Triton-X) for at  
495 least 60 minutes followed by incubation with primary antibodies diluted in 1X PBST with



496 3% BSA at 4°C overnight. Samples were washed for at least 1 hour in 1X PBST, incubated  
497 with secondary antibody in 1X PBST with 3% BSA at 4°C overnight, washed as above, and  
498 mounted in VECTASHIELD with DAPI (Vector Labs). Images were acquired using an upright  
499 Leica TCS SP8 confocal microscope with a 63X oil immersion objective lens (NA = 1.4) and  
500 processed using Adobe Photoshop and ImageJ software.

501 The following primary antibodies were used: anti- $\alpha$ -tubulin (1:100; mouse, Sigma-  
502 Aldrich T6199), anti-FLAG (1:500; rabbit, Invitrogen PA1-984B), anti-Reptin (1:200; rabbit,  
503 gift of Andrew Saurin (Diop et al., 2008)), anti-Pontin (1:200; guinea pig, this study),  
504 Phalloidin-Alexa546 or 488 (1:200; ThermoFisher A22283 or A12379). The Pontin antibody  
505 was generated by injecting a peptide (CKVNGRNQISKDDIEDVH, targeting 18aa from the c  
506 terminal end of Pontin) in guinea pigs (Covance). Alexa Fluor-conjugated secondary  
507 antibodies (Life Technologies) were used at a dilution of 1:200.

508 A modified version of Stefanini's fixative (4% formaldehyde, 0.18% w/v Picric Acid  
509 (Ricca Chemical 5860), 0.3M PIPES pH7.5 (Alfa Aesar J63617), 0.05% Tween-20) was used  
510 in order to detect Kl-3 (Muller, 2008). No signal was detectable using traditional  
511 formaldehyde fixation.

512

### 513 **Immunofluorescence staining with single molecule RNA fluorescent *in situ*** 514 **hybridization**

515 To combine immunofluorescent staining with smFISH, testes from 2-3 day old flies  
516 were dissected in 1X PBS and fixed in 4% formaldehyde in 1X PBS for 30 minutes. Then testes  
517 were washed briefly in PBS and permeabilized in 70% ethanol overnight at 4°C (unless from  
518 a strain expressing GFP, in which case this step was omitted). Testes were then washed with  
519 1X PBS and blocked for 30 minutes at 37°C in blocking buffer (1X PBS, 0.05% BSA, 50 $\mu$ g/mL  
520 E. coli tRNA, 10mM Vanadyl Ribonucleoside complex, 0.2% Tween-20). Primary antibodies  
521 were diluted in blocking buffer and incubated at 4°C overnight. The testes were washed with  
522 1X PBS containing 0.2% Tween-20, re-blocked for 5 minutes at 37°C in blocking buffer and  
523 incubated 4°C overnight in blocking buffer containing secondary antibodies. Then testes  
524 were washed with 1X PBS containing 0.2% Tween-20 and re-fixed for 10 minutes before  
525 continuing the smFISH starting from the brief rinse with wash buffer.

526

## 527 **RT-qPCR**

528 Total RNA from testes (50 pairs/sample) was extracted using TRIzol (Invitrogen)  
529 according to the manufacturer's instructions. 1µg of total RNA was reverse transcribed using  
530 SuperScript III® Reverse Transcriptase (Invitrogen) followed by qPCR using *Power SYBR*  
531 *Green* reagent (Applied Biosystems) on a QuantStudio 6 Real-Time PCR system (Applied  
532 Biosystems). Primers for qPCR were designed to amplify only mRNA. The genes analyzed by  
533 qPCR are all predicted to contain megabase sized introns, and primers were designed to span  
534 these large introns such that a product would be detect only if the intron had been spliced  
535 out (Fingerhut et al., 2019). Relative expression levels were normalized to GAPDH and cross-  
536 sibling controls. All reactions were done in technical triplicates with at least two biological  
537 replicates. Graphical representation was inclusive of all replicates. Primers used are listed in  
538 [Table S1](#).

539

## 540 **Western blot**

541 Testes (40 pairs/sample) were dissected in Schneider's media at room temperature  
542 within 30 minutes, the media was removed and the samples were frozen at -80°C until use.  
543 After thawing, testes were then lysed in 200uL of 2X Laemmli Sample Buffer + βME (BioRad  
544 161-0737). For Kl-3, samples were separated on a NuPAGE Tris-Acetate gel (3-8%, 1.5mm,  
545 Invitrogen) and for Rept and Pont, samples were separated on a Novex Tris-Glycine gel  
546 (10%, 1mm, Invitrogen) with the appropriate running buffer in a Xcell SureLock mini-cell  
547 electrophoresis system (Invitrogen). For Kl-3, proteins were transferred using the XCell II  
548 blot module (Invitrogen) onto polyvinylidene fluoride (PVDF) membrane (Immobilon-P,  
549 Millipore) using NuPAGE transfer buffer (Invitrogen) without added methanol. For Rept and  
550 Pont, transfer buffer contained 20% methanol. Membranes were blocked in 1X TBST (0.1%  
551 Tween-20) containing 5% nonfat milk, followed by incubation with primary antibodies  
552 diluted in 1X TBST containing 5% nonfat milk. Membranes were washed with 1X TBST,  
553 followed by incubation with secondary antibodies diluted in 1X TBST containing 5% nonfat  
554 milk. After washing with 1X TBST, detection was performed using the Pierce® ECL Western  
555 Blotting Substrate enhanced chemiluminescence system (Thermo Scientific). Primary  
556 antibodies used were anti-α-tubulin (1:2,000; mouse, Sigma-Aldrich T6199), anti-FLAG

557 (1:2,500; mouse, Sigma-Aldrich F1804), anti-Reptin (1:2000; rabbit, gift of Andrew Saurin),  
558 anti-Pontin (1:2000; guinea pig, this study), anti-Vasa (1:3000; rabbit, Santa Cruz  
559 Biotechnology D-260). The secondary antibodies were horseradish peroxidase (HRP)  
560 conjugated goat anti-mouse IgG, anti-rabbit IgG, or anti-guinea pig IgG (1:10,000; Abcam).

561

### 562 **Phase contrast microscopy**

563 Seminal vesicles were dissected in 1X PBS and transferred to slides for live  
564 observation by phase contrast on a Leica DM5000B microscope with a 40X objective (NA =  
565 0.75) and imaged with a QImaging Retiga 2000R Fast 1394 Mono Cooled camera. Images  
566 were adjusted in Adobe Photoshop.

567

### 568 **Transmission electron microscopy**

569 Testes were fixed for one hour or overnight (at 4°C) with 2.5% glutaraldehyde in 0.1M  
570 Sorensen's buffer, pH7.4. Samples were rinsed twice for 5 minutes each with 0.1 M  
571 Sorensen's buffer and post fixed for one hour in 1 % osmium tetroxide in 0.1 M Sorensen's  
572 buffer. Next, testes were rinsed twice in double distilled water for 5 minutes each and *en bloc*  
573 stained with 2 % uranyl acetate in double distilled water for one hour. The samples were  
574 them dehydrated in increasing concentrations of ethanol, rinsed with acetone, and  
575 embedded in Epon epoxy resin. Thin sections were mounted on Formvar/carbon-coated  
576 slotted grids and post-stained with uranyl acetate and lead citrate. Samples were examined  
577 on a JEOL1400 transmission electron microscope and images captured using a sCMOS XR401  
578 custom engineered optic camera by AMT (Advanced Microscopy Techniques Corp.).

579

### 580 **Online supplemental material**

581 Fig. S1 shows efficiency of RNAi knockdown of *kl-3*, *kl-5*, *kl-2*, and *Dhc98D* by smFISH  
582 and lack of dependence upon a single one of those transcripts for kl-granule formation  
583 (related to Fig. 1). Fig. S2 shows that RNAi of *rept* or *pont* results in efficient knockdown of  
584 both (related to Fig. 4). Fig. S3 shows the sterility phenotype of *kl-3*, *kl-5*, *kl-2*, and *Dhc98D*  
585 RNAi flies (related to Fig. 5). Fig. S4 shows smFISH for other axonemal, Y-linked, and  
586 spermatid-essential transcripts (related to Discussion).

587

588 **Acknowledgements**

589 We thank Drs. Dennis McKearin, Cayetano Gonzalez, and Andrew Saurin, the  
590 Bloomington Stock Center, and the Vienna *Drosophila* Resource Center for reagents. We  
591 thank Sasha Meshinchi and the University of Michigan Microscopy Core for help with EM  
592 experiments. We thank the Yamashita laboratory and Drs. Sue Hammoud and Joshua  
593 Bembenek for discussion and comments on the manuscript, Drs. Tomer Avidor-Reiss and  
594 Tony Mahowald for helpful suggestions, and Dr. Jiandie Lin for sharing equipment. This work  
595 was supported by the Howard Hughes Medical Institute (to YMY) and the NIH Cellular and  
596 Molecular Biology Training Grant T32-GM007315 (to JMF). The authors declare no  
597 competing financial interests.

598

599 **Author Contributions:** J.M. Fingerhut conceived the project and conducted experiments.  
600 J.M. Fingerhut and Y.M. Yamashita designed experiments, analyzed the data, and wrote the  
601 manuscript.

602

603 **Figures**

604

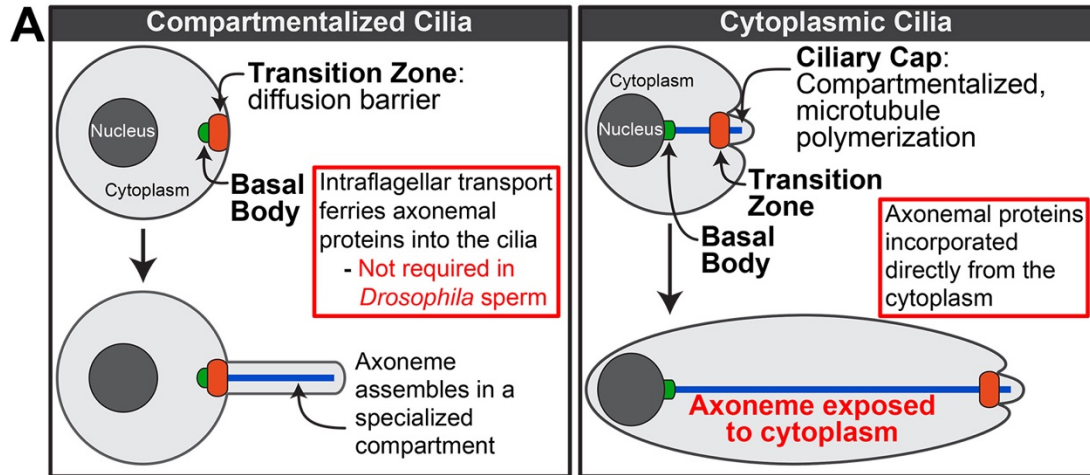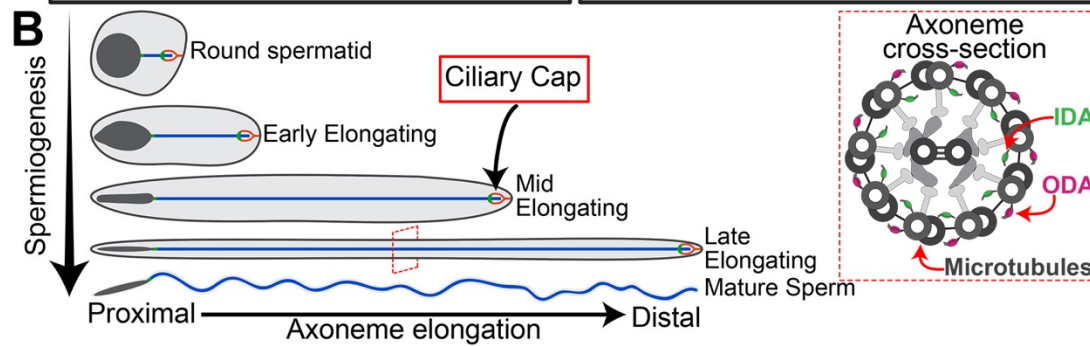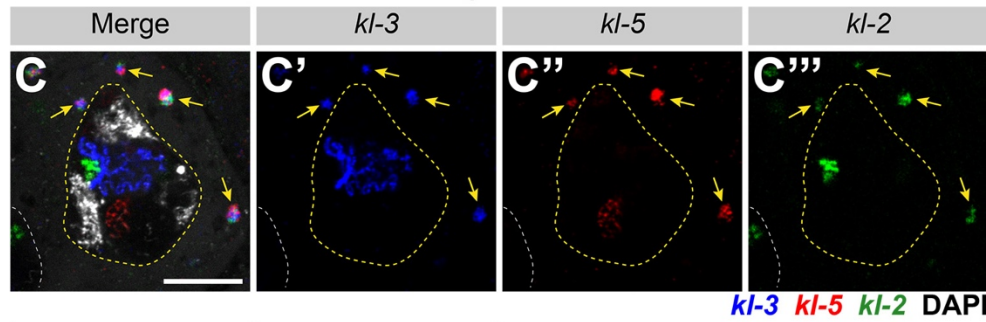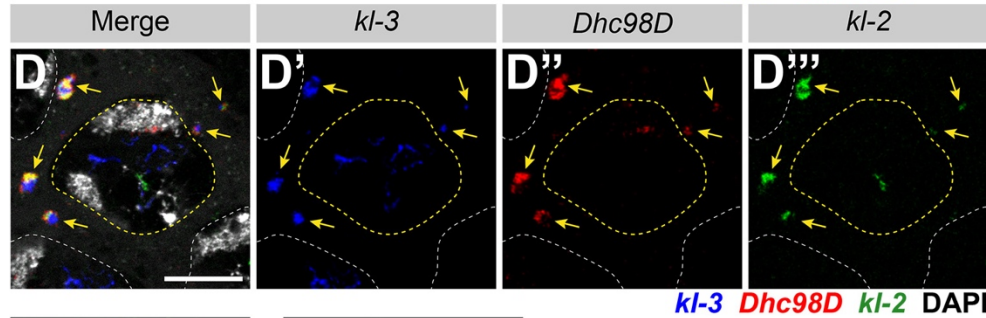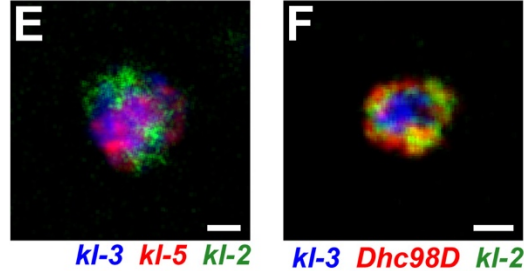

**G**

| Gene          | Function    | Location |
|---------------|-------------|----------|
| <i>kl-3</i>   | Axonemal    | ODA      |
| <i>kl-5</i>   | dynein      | ODA      |
| <i>kl-2</i>   | heavy chain | IDA      |
| <i>Dhc98D</i> | chain       | IDA      |

606 **Figure 1: Axonemal dynein heavy chain mRNAs colocalize in an RNP granule in**  
607 **spermatocytes.**

608 **(A)** Diagram comparing and contrasting traditional compartmentalized cilia and  
609 cytoplasmic cilia. Nucleus (dark gray), cytoplasm (light gray), basal body (green), transition  
610 zone (orange) and axoneme (blue). **(B)** Diagram of *Drosophila* spermiogenesis with stages of  
611 spermatid elongation. Nucleus (dark gray), cytoplasm (light gray), basal body & ring  
612 centriole (green), ciliary cap (orange) and axoneme (blue). Axoneme cross section image  
613 showing location of axonemal dynein arms. Microtubules and other structural components  
614 (gray), inner dynein arm (green) and outer dynein arm (magenta). **(C and D)** smFISH against  
615 axonemal dynein heavy chain transcripts in SCs showing *kl-3*, *kl-5*, and *kl-2* mRNAs (C) or *kl-*  
616 *3*, *kl-2*, and *Dhc98D* mRNAs (D) in kl-granules. *kl-3* (blue), *kl-2* (green), *kl-5* (red, C), *Dhc98D*  
617 (red, D), DAPI (white), kl-granules (yellow arrows), SC nuclei (yellow dashed line),  
618 neighboring SC nuclei (white dashed line). Bar: 10µm. **(E and F)** smFISH against *kl-3*, *kl-5*,  
619 and *kl-2* (E) or *kl-3*, *kl-2*, and *Dhc98D* (F) showing a single kl-granule. *kl-3* (blue), *kl-2* (green),  
620 *kl-5* (red, E), *Dhc98D* (red, F). Bar: 1µm. **(G)** Table listing the genes focused on in this study,  
621 their function and their localization within the axoneme.

622

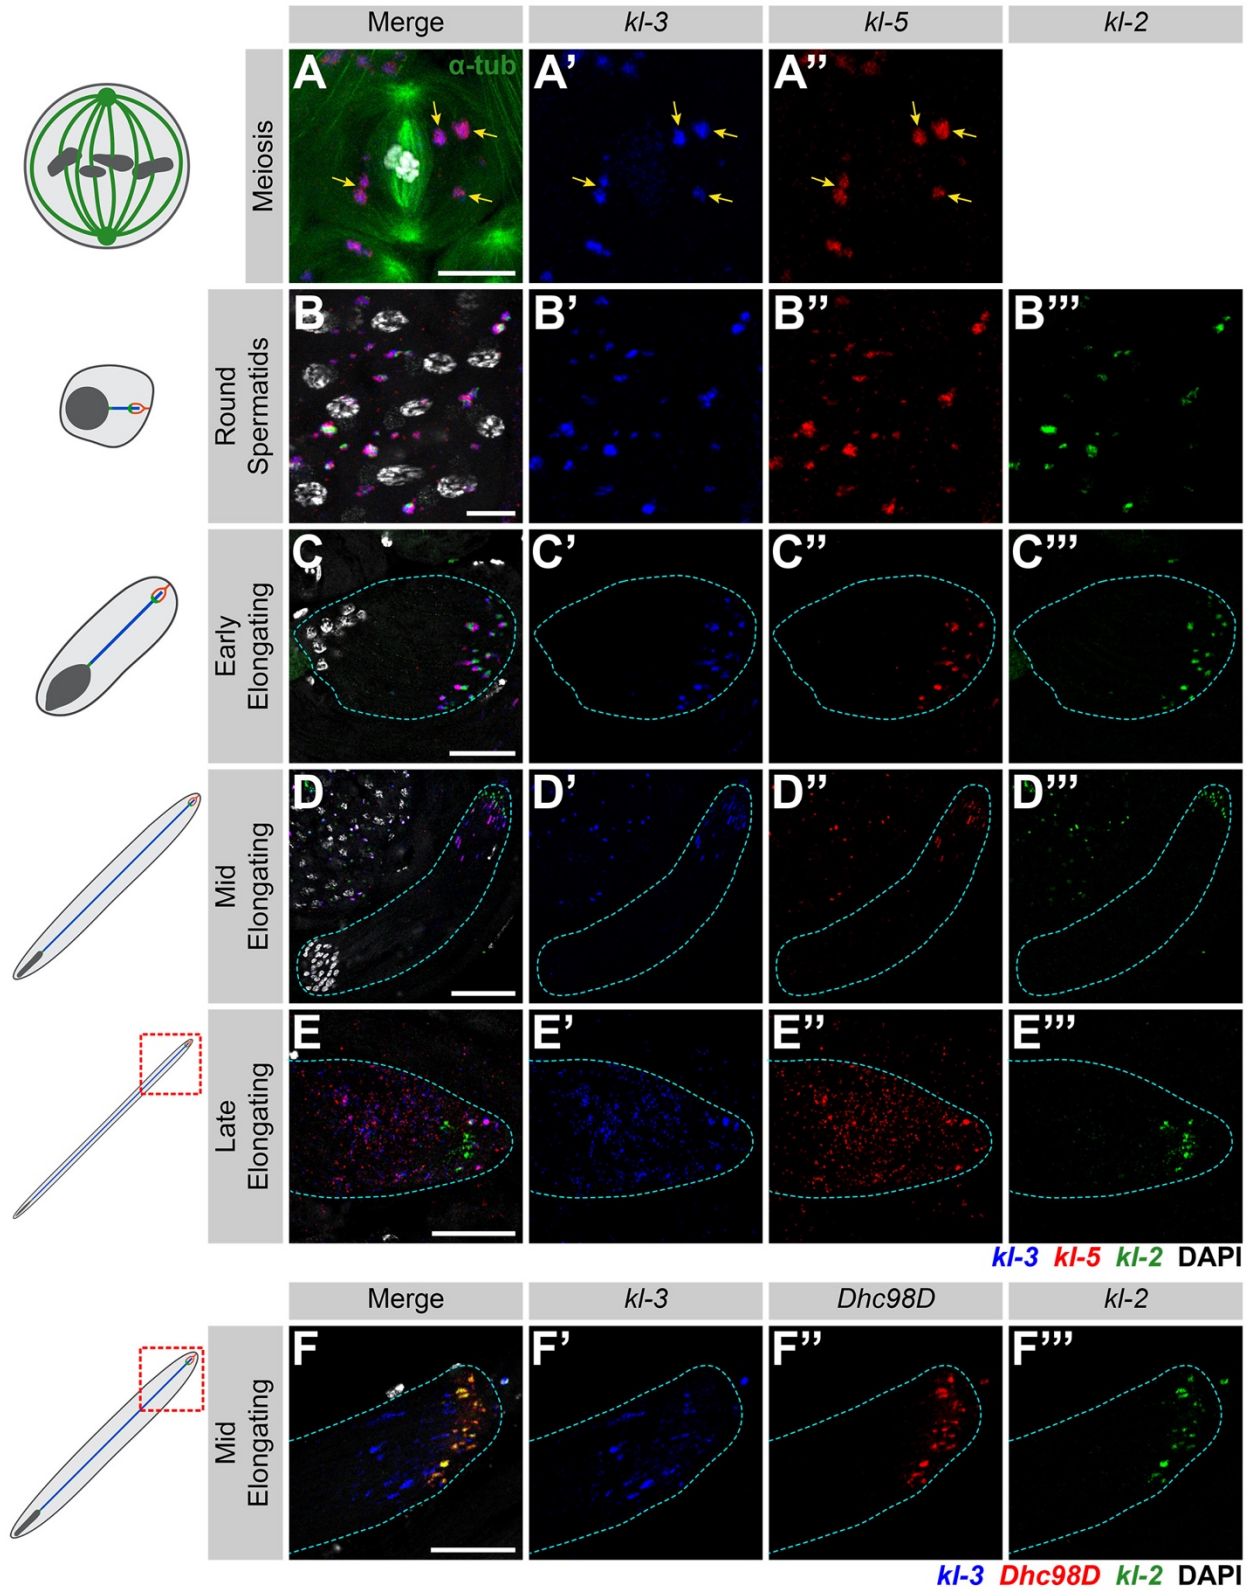

623

624 **Figure 2: *kl*-granules segregate during the meiotic divisions and localize to the distal**

625 **end of elongating spermatids.**

626 **(A)** smFISH against *kl-3* and *kl-5* during meiosis. *kl-3* (blue), *kl-5* (red),  $\alpha$ -tubulin-GFP  
 627 (green), DAPI (white) and kl-granules (yellow arrows). Bar: 10 $\mu$ m. **(B – E)** smFISH against  
 628 *kl-3*, *kl-5*, and *kl-2* during spermiogenesis. The round spermatid (B), early elongating  
 629 spermatid (C), mid elongating spermatid (D) and late elongating spermatid (E) stages are  
 630 shown. *kl-3* (blue), *kl-5* (red), *kl-2* (green), DAPI (white), spermatid cyst (cyan dashed line).  
 631 Bar: 10 $\mu$ m (B), 25 $\mu$ m (C and E) or 50 $\mu$ m (D). **(F)** smFISH against *kl-3*, *Dhc98D*, and *kl-2* in  
 632 mid elongating spermatids. *kl-3* (blue), *Dhc98D* (red), *kl-2* (green), DAPI (white), spermatid  
 633 cyst (cyan dashed line). Bar: 25 $\mu$ m.  
 634

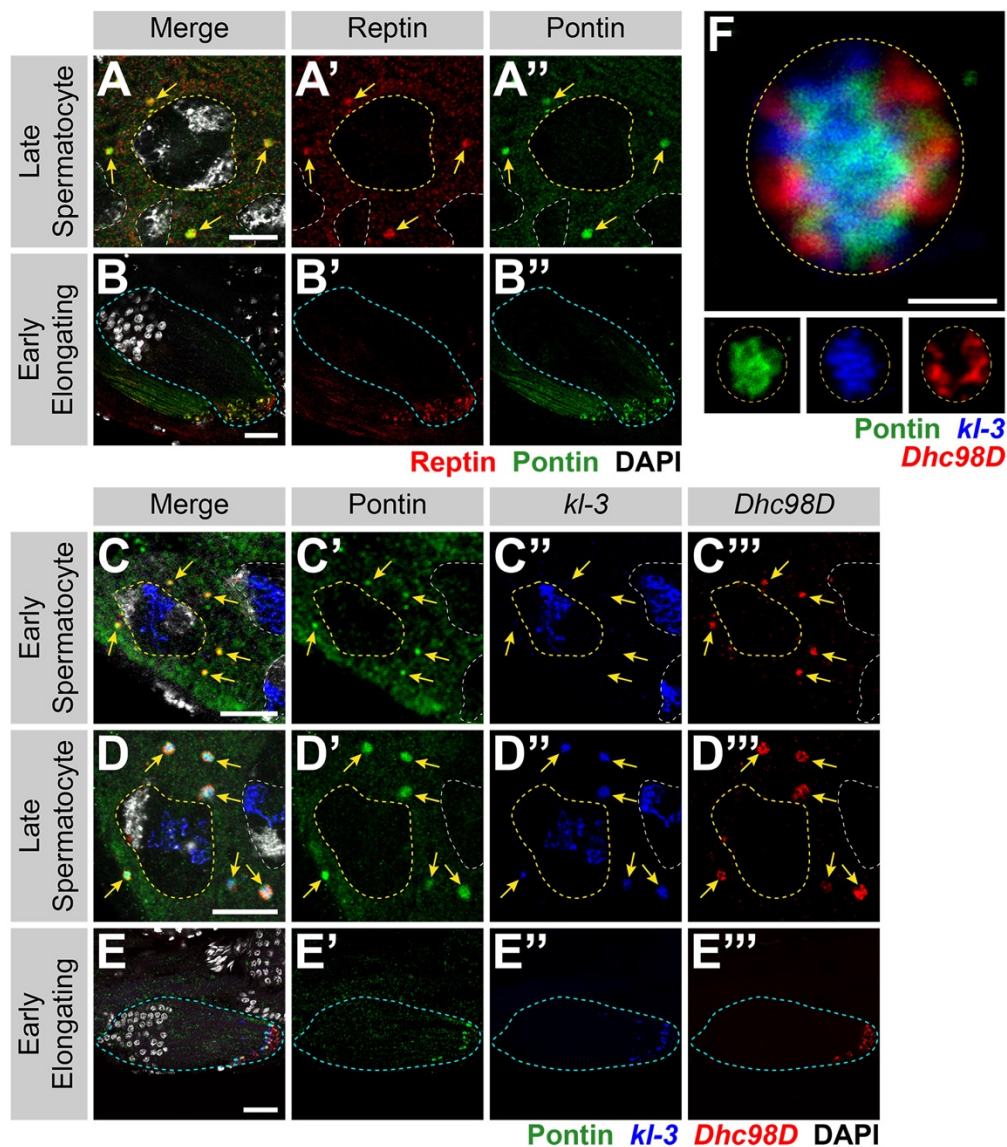

635

636 **Figure 3: Reptin and Pontin colocalize with the *kl*-granules.**



637 **(A and B)** Rept and Pont colocalization in SCs (A) and early elongating spermatids (B). Rept  
638 (red), Pont (green), DAPI (white), SC nuclei (yellow dashed line, A), neighboring SC nuclei  
639 (white dashed line, A), kl-granules (yellow arrows, C) spermatid cyst (cyan dashed line, B).  
640 Bar: 10 $\mu$ m (A) or 25 $\mu$ m (B). **(C – E)** IF-smFISH for Pont protein and *kl-3* and *Dhc98D* mRNAs  
641 in early SCs (C), late SCs (D) and early elongating spermatids (E). Pont (green), *kl-3* (blue),  
642 *Dhc98D* (red), DAPI (white), SC nuclei (yellow dashed line, C and D), neighboring SC nuclei  
643 (white dashed line, C and D), kl-granules (yellow arrows, C and D) spermatid cyst (cyan  
644 dashed line, E). Bar: 10 $\mu$ m (C and D) or 25 $\mu$ m (E). **(F)** IF-smFISH for Pont protein and *kl-3*  
645 and *Dhc98D* mRNAs in a single kl-granule. Pont (green), *kl-3* (blue), *Dhc98D* (red) and kl-  
646 granule boundary (yellow dashed line). Bar: 1 $\mu$ m.  
647

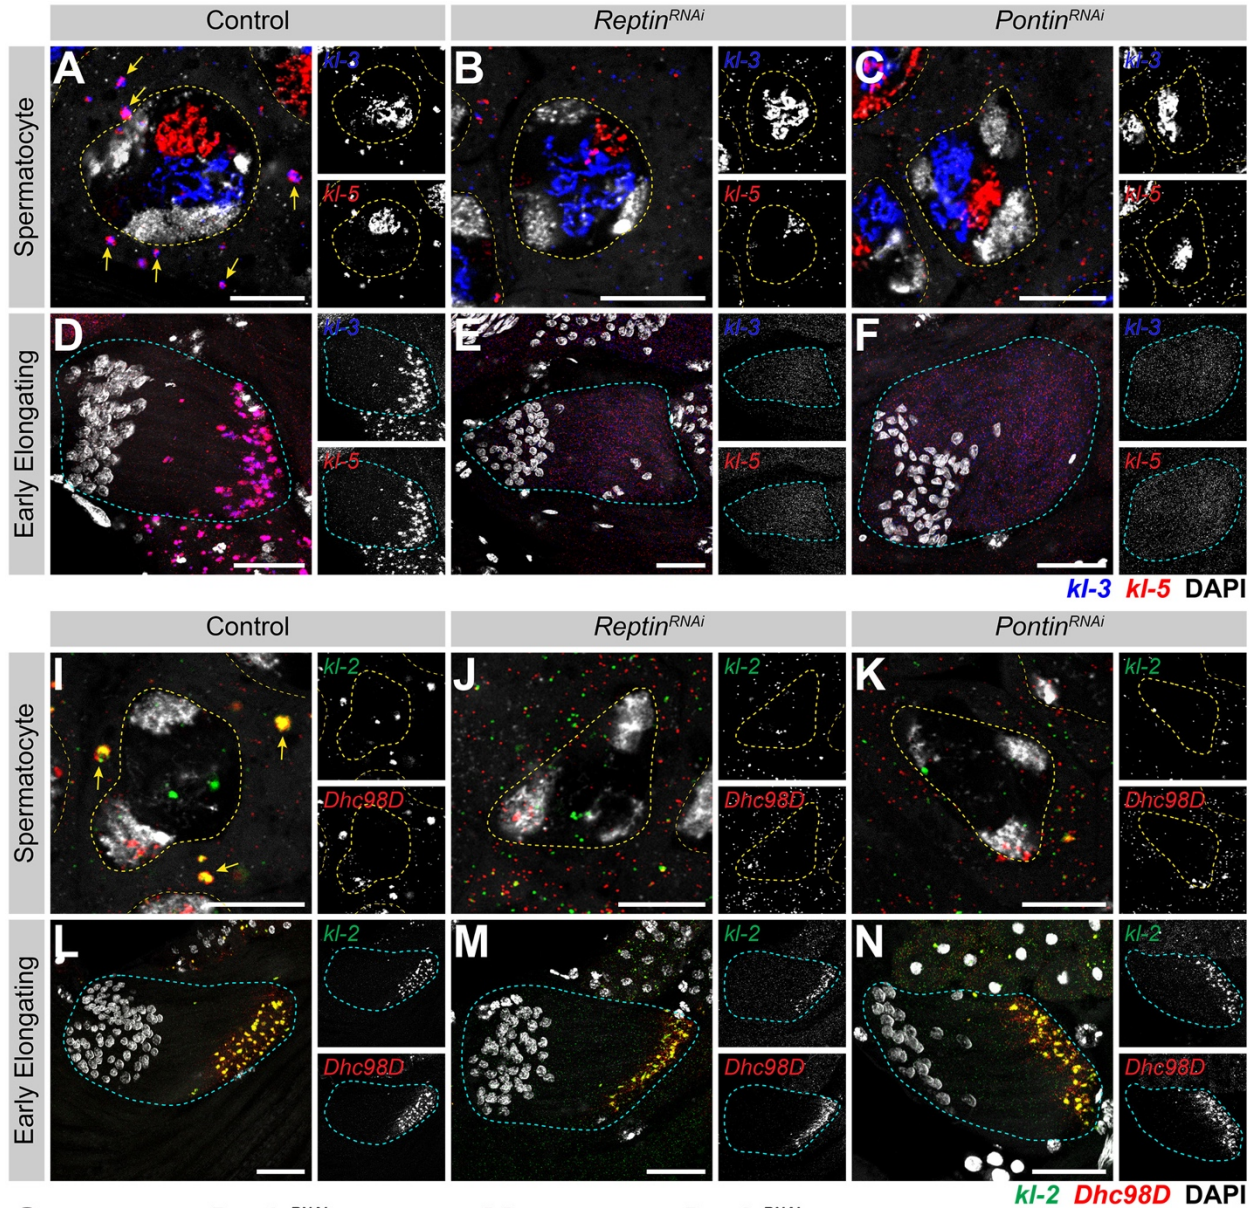

648

649

**Figure 4: Reptin and Pontin are required for kl-granule assembly.**

650 **(A – F)** smFISH against *kl-3* and *kl-5* in control (A and D), *rept* RNAi (*bam-gal4>UAS-*  
651 *rept<sup>KK105732</sup>*, B and E) or *pont* RNAi (*bam-gal4>UAS-pont<sup>KK101103</sup>*, C and F) SCs (A – C, single z  
652 plane) and early elongating spermatids (D – F, z-projection). *kl-3* (blue), *kl-5* (red), DAPI  
653 (white), SC nuclei (yellow dashed lines), neighboring SC nuclei (narrow yellow dashed lines),  
654 SC kl-granules (yellow arrows) and spermatid cyst (cyan dashed line). Bar: Bar: 10µm (A –  
655 C) or 25µm (D – F). **(G and H)** RT-qPCR in *rept* RNAi (*bam-gal4>UAS-rept<sup>KK105732</sup>*, G) or *pont*  
656 RNAi (*bam-gal4>UAS-pont<sup>KK101103</sup>*, H) for *kl-3*, *kl-5*, and *kl-2* using the indicated primer sets  
657 (see [Table S1](#)). Data was normalized to GAPDH and sibling controls. **(I – N)** smFISH against  
658 *kl-2* and *Dhc98D* in control (I and L), *rept* RNAi (*bam-gal4>UAS-rept<sup>KK105732</sup>*, J and M) or *pont*  
659 RNAi (*bam-gal4>UAS-pont<sup>KK101103</sup>*, K and N) SCs (I – K, single z plane) and early elongating  
660 spermatids (L – N, z-projection). *kl-2* (green), *Dhc98D* (red), DAPI (white), SC nuclei (yellow  
661 dashed lines), neighboring SC nuclei (narrow yellow dashed lines), SC kl-granules (yellow  
662 arrows) and spermatid cyst (cyan dashed line). Bar: Bar: 10µm (I – K) or 25µm (L – N).  
663

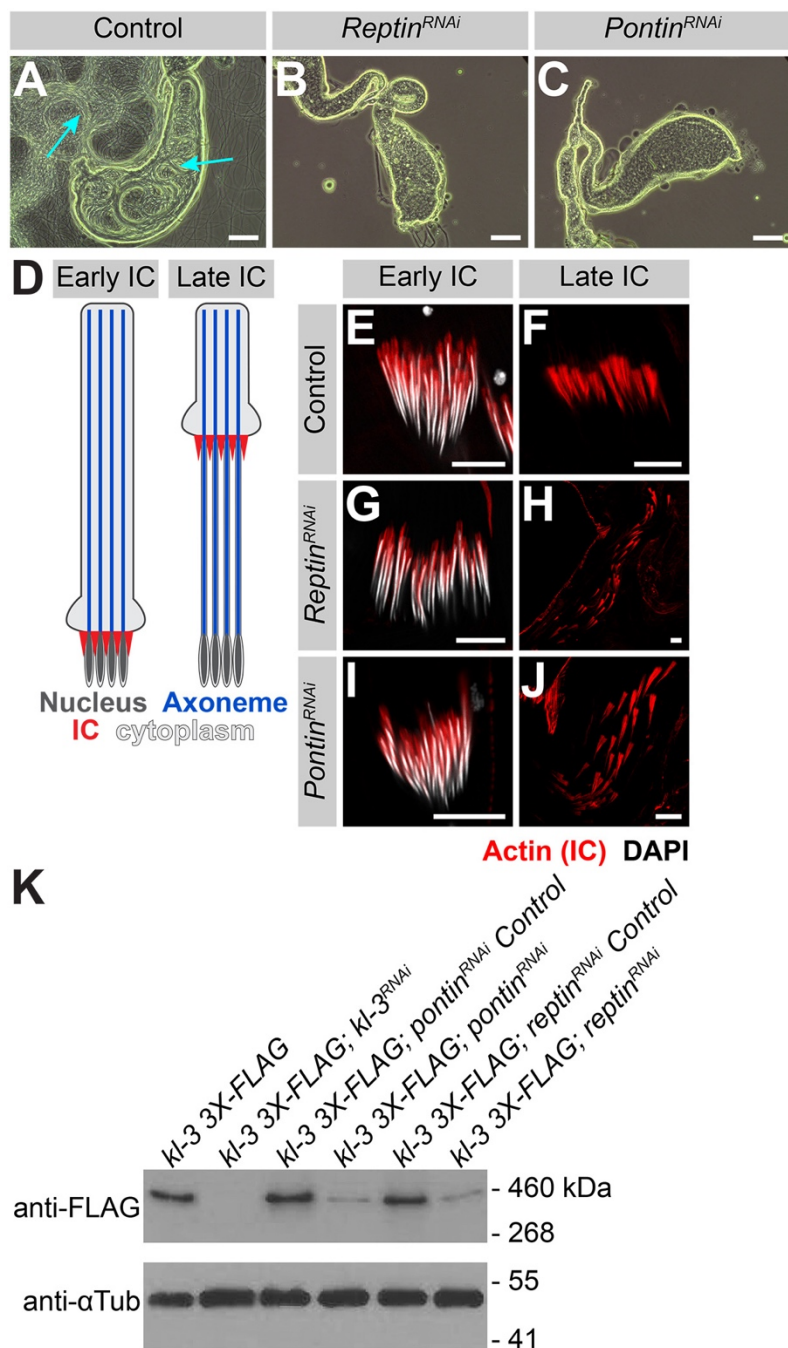

664  
665 **Figure 5: kl-granule assembly is required for efficient Kl-3 translation and sperm**  
666 **motility.**

667 **(A – C)** Phase contrast images of seminal vesicles in control (A), *rept* RNAi (*bam-gal4>UAS-*  
668 *rept*<sup>KK105732</sup>, B) and *pont* RNAi (*bam-gal4>UAS-pont*<sup>KK101103</sup>, C). Mature sperm (cyan arrows).  
669 Bar: 100 $\mu$ m. **(D)** Schematic of IC progression during individualization. Nucleus (dark gray),  
670 axoneme (blue), ICs (red) and cytoplasm (light gray). **(E – J)** Phalloidin staining of early and

671 late ICs in the indicated genotypes. Phalloidin (Actin, red) and DAPI (white). Bar 10 $\mu$ m. **(K)**

672 Western blot for Kl-3-3X FLAG in the indicated genotypes.

673

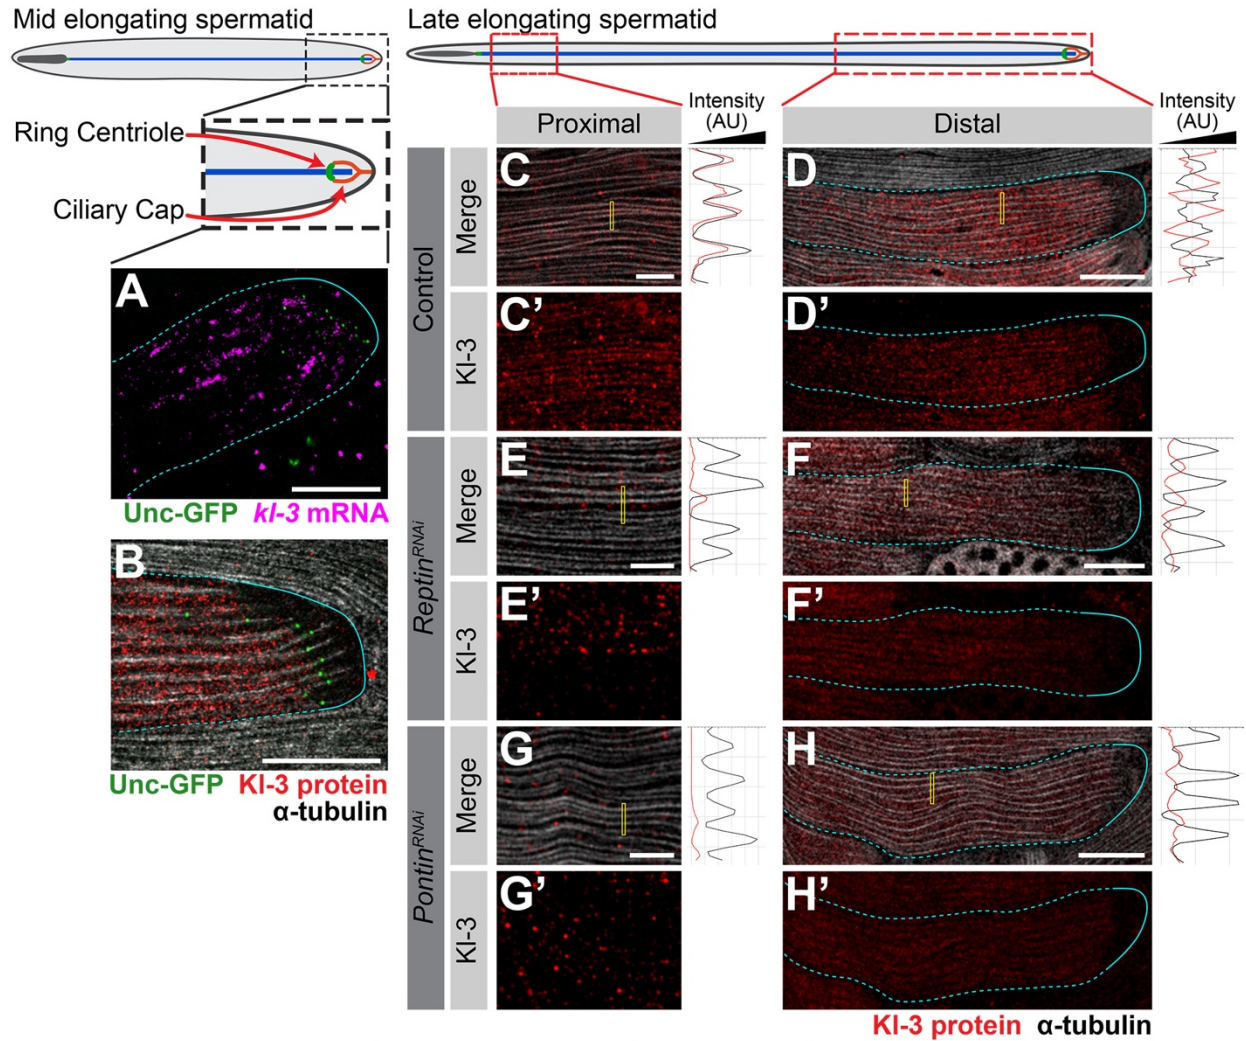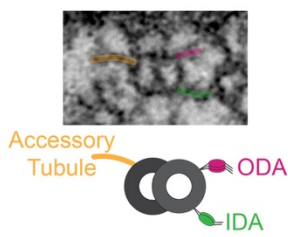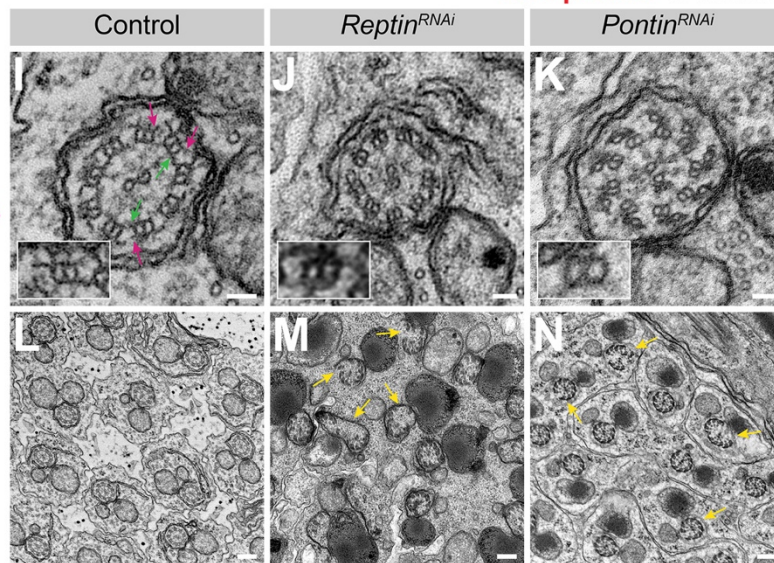

675 **Figure 6: kl-granule formation and localization are required for cytoplasmic cilia**  
676 **maturation.**

677 **(A)** smFISH against *kl-3* in flies expressing Unc-GFP. *kl-3* (magenta), Unc-GFP (ring centriole,  
678 green), transition zone (yellow arrows), and spermatid cyst (cyan, dashed line: cytoplasmic  
679 region, solid line: compartmentalized region). Bar: 20 $\mu$ m. **(B)** Kl-3-3X FLAG protein in flies  
680 expressing Unc-GFP. Kl-3 (red), Unc-GFP (ring centriole, green),  $\alpha$ -tubulin (white), transition  
681 zone (yellow arrows), and spermatid cyst (cyan, dashed line: cytoplasmic region, solid line:  
682 compartmentalized region). Bar: 20 $\mu$ m. **(C – H)** Kl-3-3X FLAG protein expression in control  
683 (C and D), *rept* RNAi (*bam-gal4>UAS-rept<sup>KK105732</sup>*, E and F) and *pont* RNAi (*bam-gal4>UAS-*  
684 *pont<sup>KK101103</sup>*, G and H) proximal (C, E and G) and distal (D, F and H) regions of late elongating  
685 spermatids. Kl-3 (red),  $\alpha$ -tubulin-GFP (white), transition zone (yellow arrows), and  
686 spermatid cyst (cyan, dashed line: cytoplasmic region, solid line: compartmentalized region).  
687 Intensity plots are shown for the regions within the yellow rectangles. Bar: 5 $\mu$ m (C, E and G)  
688 or 25 $\mu$ m (D, F and H). **(I – N)** TEM images of control (I and L), *rept* RNAi (*bam-gal4>UAS-*  
689 *rept<sup>KK105732</sup>*, J and M) and *pont* RNAi (*bam-gal4>UAS-pont<sup>KK101103</sup>*, K and N) axonemes. Pink  
690 arrows: ODA, green arrows: IDA, yellow arrows: broken axonemes broken axonemes. The  
691 control single doublet enlarged image is duplicated to the left of the figure and colored to  
692 match the diagram. Bar: 50nm (I – K) or 200nm (L – N).

693

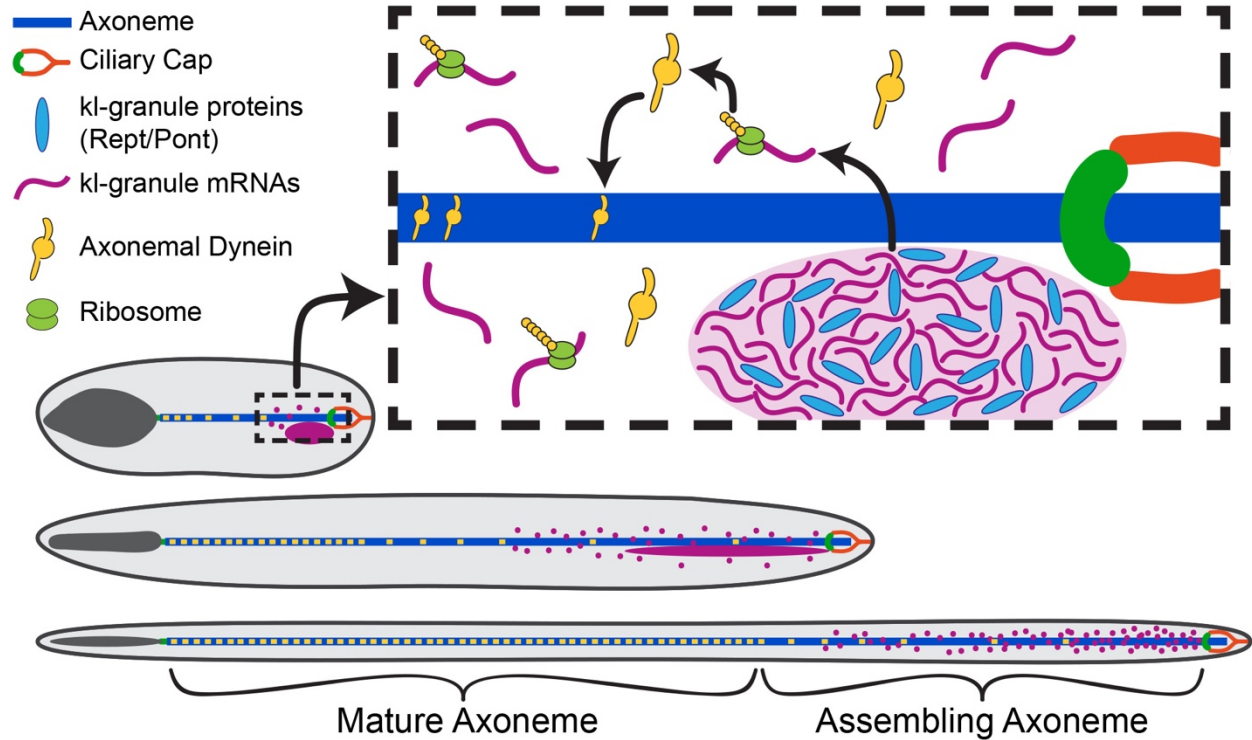

694

695 **Figure 7: Model for cytoplasmic cilia maturation.**

696 The kl-granule (light purple) localizes immediately proximal to the ciliary cap (orange) and  
697 ring centriole (green) within the cytoplasmic compartment. Constituent mRNAs (purple) are  
698 locally translated (ribosomes, lime green) and their proteins (axonemal dyneins, yellow) are  
699 incorporated into the axoneme (blue) as the microtubules are displaced from the ciliary cap.  
700 In this way, cytoplasmic cilia maturation is progressive with axonemal proteins being added  
701 to the bare microtubules as elongation proceeds.

702



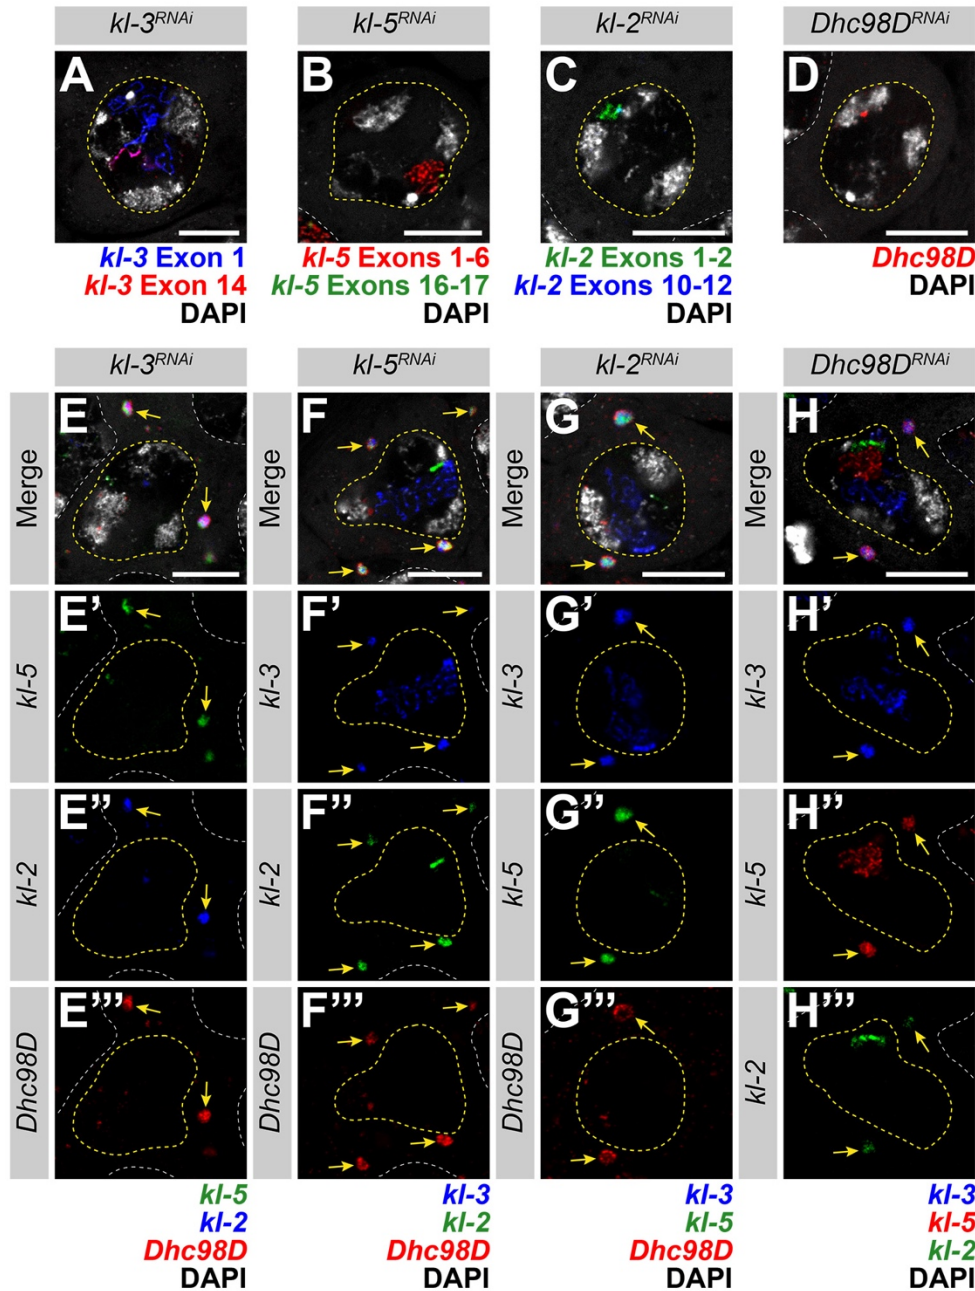

703

704 **Figure S1: *kl*-granule formation is not dependent upon any one mRNA constituent.**

705 **(A - D)** smFISH against each known *kl*-granule mRNA constituent following RNAi of that  
 706 constituent shows successful knockdown (no remaining cytoplasmic signal). Note that we  
 707 use multiple smFISH probe sets for some mRNAs targeted against different regions of the  
 708 transcript (see Table S1). (A) *kl-3* exon 1 (blue), *kl-3* exon 14 (red) and DAPI (white). (B) *kl-*  
 709 *5* exons 1-6 (red), *kl-5* exons 16-17 (green) and DAPI (white). (C) *kl-2* exons 1-2 (green), *kl-*  
 710 *2* exons 10-12 (blue) and DAPI (white). (D) *Dhc98D* (red) and DAPI (white). For all, SC nuclei

711 (yellow dashed line) and neighboring SC nuclei (white dashed line). Bar: 10 $\mu$ m. **(E – H)**  
 712 smFISH against the other three constituent mRNAs after RNAi of the fourth mRNA. Note that  
 713 the color used to represent each smFISH probe corresponds to the probe sets in A – D. (E)  
 714 *kl-5* (green), *kl-2* (blue), *Dhc98D* (red) and DAPI (white). (F) *kl-3* (blue), *kl-5* (green), *Dhc98D*  
 715 (red) and DAPI (white). (G) *kl-3* (blue), *kl-5* (green), *Dhc98D* (red) and DAPI (white). (H) *kl-*  
 716 *3* (blue), *kl-5* (red), *kl-2* (green) and DAPI (white). For all, SC nuclei (yellow dashed line),  
 717 neighboring SC nuclei (white dashed line), and *kl*-granules (yellow arrows). Bar: 10 $\mu$ m.  
 718

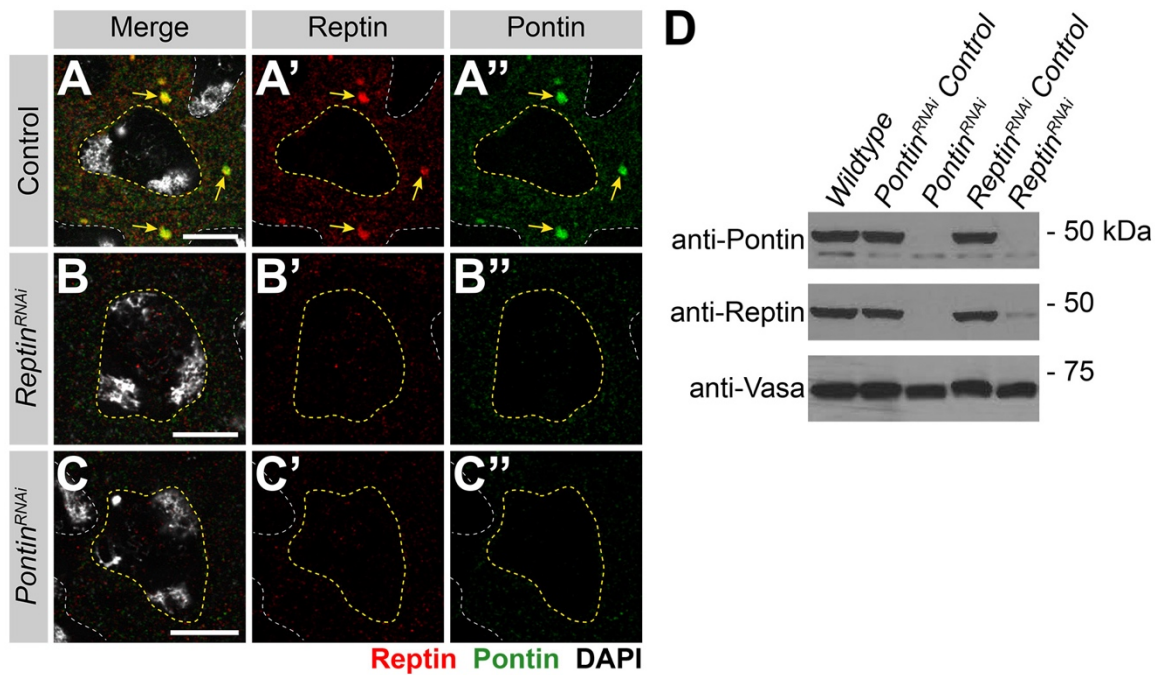

719  
 720 **Figure S2: RNAi of *rept* or *pont* results in loss of both proteins.**  
 721 **(A – C)** Rept and Pont protein expression in SCs in control (A), *rept* RNAi (*bam-gal4>UAS-*  
 722 *rept<sup>KK105732</sup>*, B) or *pont* RNAi (*bam-gal4>UAS-pont<sup>KK101103</sup>*, C). Rept (red), Pont (green), DAPI  
 723 (white), SC nuclei (yellow dashed line), neighboring SC nuclei (white dashed line), *kl*-  
 724 granules (yellow arrow). Bar: 10 $\mu$ m. **(D)** Western blot for Pont and Rept in the indicated  
 725 genotypes.  
 726

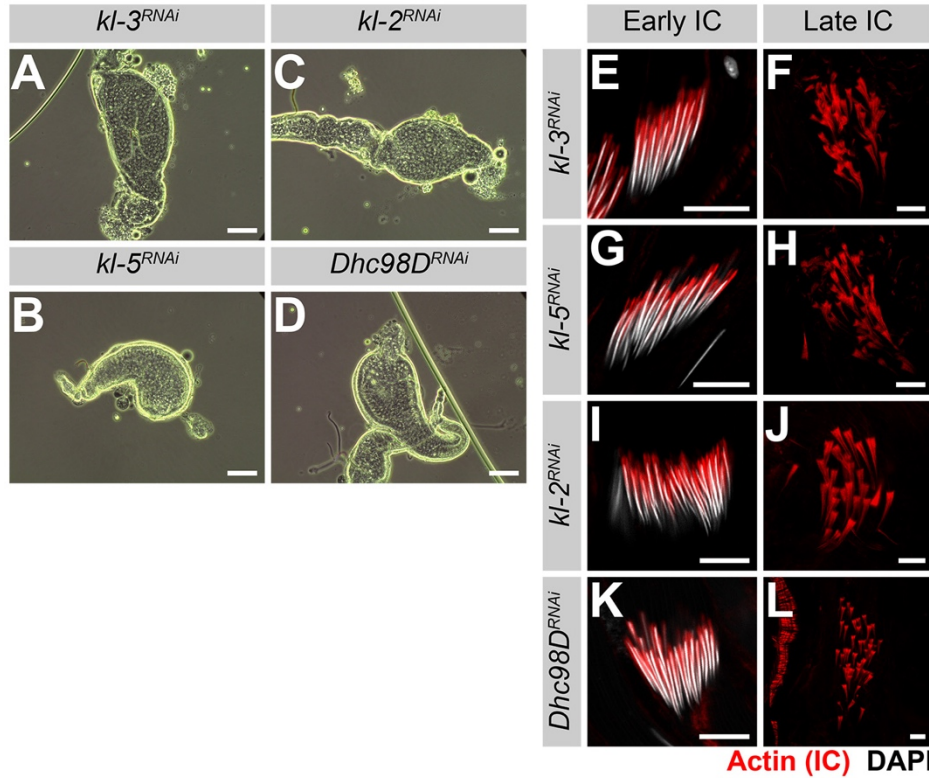

727

728 **Figure S3: RNAi of *kl-3*, *kl-5*, *kl-2* or *Dhc98D* results in the same sterility phenotype seen**  
729 **in *rept* or *pont* RNAi testes.**

730 **(A - D)** Phase contrast images of seminal vesicles in *kl-3* RNAi (*bam-gal4>UAS-kl-*  
731 *3<sup>TRiP.HMC03546</sup>*, A), *kl-5* RNAi (*bam-gal4>UAS-kl-5<sup>TRiP.HMC03747</sup>*, B), *kl-2* RNAi (*bam-gal4>UAS-kl-*  
732 *2<sup>GC8807</sup>*, C) and *Dhc98D* RNAi (*bam-gal4>UAS-Dhc98D<sup>TRiP.HMC06494</sup>*, D). Bar: 100µm. **(E - L)**  
733 Phalloidin staining of early and late ICs in the indicated genotypes. Phalloidin (Actin, red)  
734 and DAPI (white). Bar 10µm.

735

Other axonemal protein transcripts:

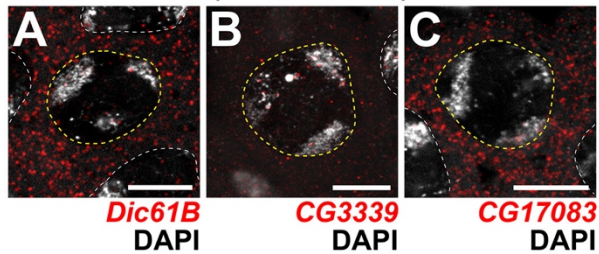

Other Y-linked transcripts:

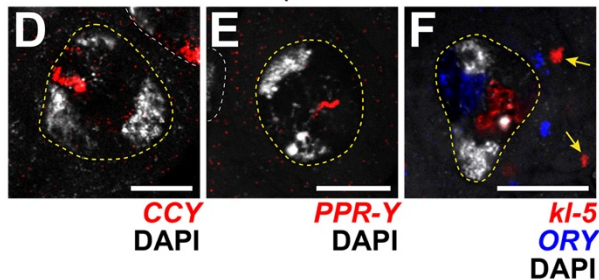

Non-axonemal spermatid protein transcript:

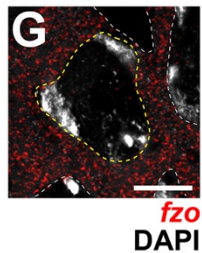

736

737 **Figure S4: Transcripts for other axonemal, Y-linked, and spermatid proteins don't**  
738 **localize to kl-granules.**

739 **(A – G)** smFISH against other axonemal (A – C), Y-linked (D – F) or spermatid-essential (G)  
740 transcripts. (A) *Dic61B* (dynein intermediate chain, red) and DAPI (white). (B) *CG3339*  
741 (axonemal dynein heavy chain, red) and DAPI (white). (C) *CG17083* (ODA docking complex,  
742 red) and DAPI (white). (D) *CCY* (red) and DAPI (white). (E) *PPR-Y* (red) and DAPI (white).  
743 (F) *kl-5* (red), *ORY* (blue) DAPI (white) and kl-granules (yellow arrow). (G) *fzo* (red) and  
744 DAPI (white). For all, SC nuclei (yellow dashed line) and neighboring SC nuclei (white dashed  
745 line). Bar: 10 $\mu$ m.

746

747

748

749

750

751 **Table S1: smFISH probes and RT-qPCR primers used in this study**

| Probe Target                                            | Fluorophore | 5'-Sequence-3'                                                                                                                                                                                                                                                                                                                                                                                                                                                                                                                                                                                                                                                                                                                                                                                                                                                                                                                                                                                                                                                                                                                                                                                                      |
|---------------------------------------------------------|-------------|---------------------------------------------------------------------------------------------------------------------------------------------------------------------------------------------------------------------------------------------------------------------------------------------------------------------------------------------------------------------------------------------------------------------------------------------------------------------------------------------------------------------------------------------------------------------------------------------------------------------------------------------------------------------------------------------------------------------------------------------------------------------------------------------------------------------------------------------------------------------------------------------------------------------------------------------------------------------------------------------------------------------------------------------------------------------------------------------------------------------------------------------------------------------------------------------------------------------|
| <i>CG17083</i> , All exons                              | Quasar® 670 | <p>aacttcttgatttcctccat, tttccaggaaggcaagcttg,<br/> aattccttggtgcttcagcag, ctggacaggatcttcttgta,<br/> caaagctggcctcgatgatg, gcgattggtctgTTTTTgt,<br/> tcgacatggcagcgaatcag, tcagagagttaatgtcctgc,<br/> ccttctccatgTTTgaaatc, tatttgcttgacatgCGac,<br/> gctgatccggaatggTtaaa, cgcattacataggcctgatg,<br/> ctccaaaatggTcatccttt, gtaaaaccgcactcctgacg,<br/> ataagctgctctcgagatc, gaaggtgCGatgattcagga,<br/> gcaccatTTTggTgatgaa, tactTTTTctcgctgTtcag,<br/> gagcgtattcgatcagatct, aatgcagccatcgaaggTat,<br/> cTTTTggccaacaaatcaa, atctccacacgtctcatatc,<br/> tgccacctTTcgcataatac, caggaaggcggTgttatcac,<br/> ctcgaggcttagactTgcaa, tgatctTTTTgtTgtgacc,<br/> Tggagaatcttctgcagcac, ccatattgctagattccgta,<br/> gctgaaacttatcgatcacc, cgagtaatagagactctcct,<br/> catttcgTTggcatagTTga, attcagcatagTTatgtggT,<br/> caaacaggcGattcaccgaa, gtgTTggagTTatcctTTTT,<br/> ggaaatctgatccagTTggT, tgtTggattcctgTTTgtta,<br/> agattctccaaacgtgcac, tctatggaaacacatctcgca,<br/> tcaccaaggagTTTggTcag, taaccagattgacgtgggTg,<br/> cgagcagcttcaagaatcga, cgctccatcacataaacact,<br/> tgaccacatagtcgaagcgg, tcgcagatcttctcgatctg,<br/> gggtgagcacaatgtcattg, atccatgTTgaaggctTcac,<br/> tgtggacaaggacaccatcg, taaccttctcgtacagcttc</p> |
| <i>CG3339</i> , Exons 1-19                              | Quasar® 570 | <p>agtcgtgaagctggaagagg, tattgCGggcgcaaaagtag,<br/> cgctccaagacaatgtcatg, cagtgttatgtactTTggct,<br/> ccgaattaaatgcggcagtc, tTTgggtgcttcgatagTat,<br/> gaaaagttccagaaccgca, cttgtagtccaacattcgtt,<br/> agcactTTaaactcgccgaa, cattcggctgaagaacaggg,<br/> cgcaatcggTggaaagTgt, tgctcaacgagTtggctTaa,<br/> agagcaaggaattccactgt, ccatgagatccagatTTTca,<br/> tcaagtagattgcgaccgta, agaagTtggcaatcagcagg,<br/> Tggagtacagctgaaactcc, tcctcgggaaattcacgaaT,<br/> cgctggccaaatattTgttg, ttgctgaaggactaacctcg,<br/> tccatTTTTtgactgtacgc, acttcgTtTgtagTtctcgat,<br/> tgagcggcttgaacacattg, tgctTaaCGgtactcgagTg,<br/> catacatcgttagactTgcgg, tgcaaccgaaggtagactTc,<br/> ctggatgtcaagaagtcggg, ttgtcatctagggTtctgat,<br/> caatcagagtatcgatgcct, aactgcagcaattgggcaag,<br/> agaagcgtggaaaggccaat, gttaccgTtggacaagatgt,<br/> tttgatgaggTgtcggTcaa, acgaagggcacatactcatc,<br/> acgataaacgccgTtgatc, ctctcattTgctggataat,<br/> gccgaaataattcgtgcagg, ttcgaaagcaatcctcatc,<br/> actcgtaggcataaccgaaac, ggtgatataacagcgatccg,<br/> tcctTtgTaaatgTtgccac, cacgcagatgCGattgaaT,<br/> caaatcaaggcgaagtcggg, aaatagggTatcctcctcg,<br/> aagaggtcaccaatgagacc, ttctcgaactcaaagaccgg,<br/> gaaaaccgagTgtcgacat, atccacatgggatcaatgtc</p> |
| <i>Dhc98D</i> , Exons 10-16 (isoform B, these exons are | Quasar® 570 | <p>tcatactggacgaacacgcg, tcgtcaagcatgCGatagac,<br/> aacatgtcatagtcgacgct, ttgtTgaacaactccagcga,<br/> ttgatcTTTggTcgatcac, tcatagcattgaccaccaag,<br/> cagtaggttctcatgTTTgg, gcgTtatctcggTcacaaa,<br/> gtcTtgagctTTTTacctag, aagagctgcgctTtaggaag,</p>                                                                                                                                                                                                                                                                                                                                                                                                                                                                                                                                                                                                                                                                                                                                                                                                                                                                                                                                                                |

|                                                                     |                    |                                                                                                                                                                                                                                                                                                                                                                                                                                                                                                                                                                                                                                                    |                                                                                                                                                                                                                                                                                                                                                                                                                                                                                                                                                                                                                                                      |
|---------------------------------------------------------------------|--------------------|----------------------------------------------------------------------------------------------------------------------------------------------------------------------------------------------------------------------------------------------------------------------------------------------------------------------------------------------------------------------------------------------------------------------------------------------------------------------------------------------------------------------------------------------------------------------------------------------------------------------------------------------------|------------------------------------------------------------------------------------------------------------------------------------------------------------------------------------------------------------------------------------------------------------------------------------------------------------------------------------------------------------------------------------------------------------------------------------------------------------------------------------------------------------------------------------------------------------------------------------------------------------------------------------------------------|
| <p>common to all three isoforms)</p>                                |                    | <p>ctcgaagagcaccttttcaa,<br/>tgtagattccttgcataatgc,<br/>ctgtaggcactaaacgcttc,<br/>ttactgaccatccacatgat,<br/>acatctttgggcttcttatc,<br/>aagacatcgcgcttcagatt,<br/>gactgcggggaagtgtaaagc,<br/>ttgacctatacctgtcaacg,<br/>cacgcccatttggataaaga,<br/>gtagatacgattcgcagag,<br/>ggagtcgtaaagcttcttca,<br/>tacacttgaatgtctctcct,<br/>gacatcaggagaacagcggt,<br/>ggatcatccaacgggtgaaaa,<br/>tgaccagatccacaatggat,<br/>tgaaactcttctcgaaggcc,<br/>gtttccacaatggacgagta,<br/>cagcaagggtccaaattta,<br/>gtggctctgttcagattcag,</p>                                                                                                                                  | <p>tacgtggcggttctgtatgaa,<br/>gtcatttgcaattcaggtcg,<br/>ttcttttgtgatgtgtcacc,<br/>ataaacgctgtgcattcctg,<br/>cagcagatattgggactctg,<br/>actgctgagcttcaaacagg,<br/>gcaggtcctttttcataatc,<br/>gtaggaagatcacctctgac,<br/>tatcgatacgagagcgcaga,<br/>gacatggatataatgcccgat,<br/>ttccagaaaatgtgccaac,<br/>ggcgggtgatatagcatttt,<br/>tgaaccgaaggctcaaggac,<br/>ggattacgtcctcatagtac,<br/>ccactctagaagccaaatcg,<br/>ctcatcgatttcgatgagcg,<br/>cacacttgatgtcctggaac,<br/>cctcatgttatcgttgacat,<br/>atttcgtggattttctgtctc</p>                                                                                                                                    |
| <p><i>Dic61B</i>, Exon 4 (isoform A, common with other isoform)</p> | <p>Quasar® 670</p> | <p>gttcccagtttaatagtttca,<br/>aaggacttggatatacggctt,<br/>gtctggctgtgaatttcgaa,<br/>aattttgcctttccctattg,<br/>gagtggtgaagagcagagta,<br/>aacgtaagagctgacgggtg,<br/>actccttggatattgttc,<br/>tcgtcgtcctcaaaggatc,<br/>cggaacaggcgtctatctg,<br/>tcgtttgtgttgctcgagag,<br/>catcgagtagacgtactcgg,<br/>cggcagaaatcaatgtcgct,<br/>cggtagctgctgtgaggaaa,<br/>ctcgcctggatttttaaatgc,<br/>aagtttattgccgttactgg,<br/>tcgtacagaccaatggcgag,<br/>aaacttgtttgatccagcgg,<br/>gagaggctcaggaatggatc,<br/>aaccaagcaggaagggactt,<br/>gaacgaaaatgccctcagga,<br/>gtagtgatgcttaagccttg,<br/>tcatctgtcagcacgtagta,<br/>ccaagtagctgatgctgataa,<br/>gaactccattacggtgacac,</p> | <p>cttcgagagcctcaacagtg,<br/>gacttgcgtaagggtgatctt,<br/>cagatactcgtagtttcggg,<br/>tctgagcgtcattgtctgag,<br/>ggttatgaggatgggtgtga,<br/>gcgtgtcgtacatctcaaag,<br/>cgaactcatagtggtggtg,<br/>cttgtctttttcggcaacgg,<br/>atgatggcggttgcgaaactc,<br/>gggtcaaagttacggaagcgt,<br/>taccagccgaaagagcaagt,<br/>tgagtacagtcctgtaggcta,<br/>acaggaaaactgctgcccggag,<br/>acatcgtatagtagtgcgcg,<br/>aaggatggcaagaatggcga,<br/>tgcaaactgctcacatctcg,<br/>tgtctgtttcatgatcgtcg,<br/>tgataatccggaagcgggtg,<br/>actcgtccagaatcatttg,<br/>ttagactcgcaggggatac,<br/>atgtccttgtgcagaggatg,<br/>gattgagcacttgtggatgc,<br/>cgtcgtgacaacgcaggact,<br/>aggtgaggaagagtttggga</p> |
| <p><i>fzo</i>, All exons</p>                                        | <p>Quasar® 570</p> | <p>aaacgaggacaccgacgacg,<br/>gcgtccacaaactcacttaa,<br/>tttaacaggacagtctcctc,<br/>gtccaaaaaatgccaccttc,<br/>gcaggattttttcatgcaga,<br/>cagagttgaggggttttaggg,<br/>tagctatctaggcaatcgtc,<br/>ttgaagaactgcctttccac,<br/>cccacgattgttgagtata,<br/>acacctaattcatccacgag,<br/>cgtaatctgaccattcctta,<br/>accgagggcaattcgaaaa,<br/>ctctatctcggcattcaagt,<br/>gtcatttcagtcagttcttc,</p>                                                                                                                                                                                                                                                                      | <p>gcgaagacgacgatgaggat,<br/>tatatatcctgcagttctgt,<br/>aaagaacctttgcaatggcc,<br/>cattgatcacggcacttttt,<br/>aaaacagctgggtggatggc,<br/>atccaatatcgagcaacggg,<br/>actcggcgttgagaactaga,<br/>agagatttggagcgcgagagt,<br/>caacgttccatatgctgatc,<br/>aacatgatagatcctttccc,<br/>gaaactcctgatcgtctgt,<br/>acttagcaagtgtggaccaa,<br/>tctatcctccttgattagta,<br/>tctggctcgttcaaacgcac,</p>                                                                                                                                                                                                                                                                       |

|                           |             |                                                                                                                                                                                                                                                                                                                                                                                                                                                                                                                                                                                                                                                                              |                                                                                                                                                                                                                                                                                                                                                                                                                                                                                                                                                                                                                                                                         |
|---------------------------|-------------|------------------------------------------------------------------------------------------------------------------------------------------------------------------------------------------------------------------------------------------------------------------------------------------------------------------------------------------------------------------------------------------------------------------------------------------------------------------------------------------------------------------------------------------------------------------------------------------------------------------------------------------------------------------------------|-------------------------------------------------------------------------------------------------------------------------------------------------------------------------------------------------------------------------------------------------------------------------------------------------------------------------------------------------------------------------------------------------------------------------------------------------------------------------------------------------------------------------------------------------------------------------------------------------------------------------------------------------------------------------|
|                           |             | <p>gatagcacagacgaggggtat,<br/> ataacgagcgttggtactgg,<br/> aagcccaatttctttctcta,<br/> tctggctgaaagtcactcat,<br/> tccgttaactaaaggtggca,<br/> tcagtaaacggtgcccaag,<br/> cccaccaaggatcaatacaa,<br/> ctaacagtttgctgcacatc,<br/> attcagtgctcattggact,<br/> gaaacttcttcaggctgagc,</p>                                                                                                                                                                                                                                                                                                                                                                                               | <p>ctgggaattccgggtgaaat,<br/> gggggtatggagagacattga,<br/> tagattagttgccaatcgca,<br/> ttcgaaatggacttgctgctg,<br/> ttcaccaaagattccagcat,<br/> ccagttgaacgaacggatgg,<br/> cttgaaacttcgctcctggg,<br/> gtcgcaactggagctcaaaa,<br/> tgtatgtgttggtcagctc,<br/> taggtctcttgaaagtctcc</p>                                                                                                                                                                                                                                                                                                                                                                                         |
| <i>kl-2</i> , Exons 1 & 2 | Fluorescein | <p>Cgatcagtcctcagtaactttc,<br/> tctgttggaattgatcaacca,<br/> acaggaaatccaaggcaacc,<br/> ttatttcttttagaggaccga,<br/> caacatcatcttgacagta,<br/> tgggagcatatataagctct,<br/> aacgttgcttcacattgtct,<br/> ttgctgttaagattcctaga,<br/> ctcttttgctatttctttga,<br/> cgcaatacactccaagttct,<br/> tggttaagggctctgtcattt,<br/> accgatatagccagaactcg,<br/> ttgaacatccacttgatcca,<br/> attagttcatcgatctgttt,<br/> atgtgatgtttccatagct,<br/> gtgagacaaaagttgggctt,<br/> gtattgttcagagtttaacc,<br/> ccttttcagtacaaaaccgt,<br/> attcctttataagtcaggca,<br/> ccaacctattcgtatgttta,<br/> ctccataaaggcatcgacat,<br/> gtatactctctgattcgtca,<br/> gcttcaaattctgtaccact,<br/> ataatgccgtaagagtcacc,</p> | <p>ttcacatattcaacaagccc,<br/> gtgagaacatcgcaatcgta,<br/> cataaatcaataaccggggc,<br/> cgaagttaacctgtcgtga,<br/> aaatttcaataggcagcca,<br/> cccattccataaaaattcga,<br/> atztatccagggacgtacag,<br/> aactgtcatgccagacattt,<br/> attctctgtcgtacgatgaa,<br/> aattcgaataagcgtagccc,<br/> ctcatccccaacactaatat,<br/> tgcgcatttagctccttgaag,<br/> gggtacttcgtagaactctt,<br/> ccatcagttcatgtgtagat,<br/> gttgtgaacatggttgcat,<br/> tcaagtgaattgttcgggga,<br/> ccagttatataaacacgtct,<br/> tccaaaccttgaacttctctg,<br/> ttttgcatgggtttttgaca,<br/> aatcattgcattgtcaaggc,<br/> gtcttccgaaaaccatcatt,<br/> taccaccgaattgaggctta,<br/> attttcaacggtgtcggcag,<br/> atgatctctttggaatccgt</p> |
| <i>kl-2</i> , Exons 10-12 | Quasar® 670 | <p>tcggttcgagtaggactgtat,<br/> ggagtgcttcatattcatt,<br/> ccgtaatttactcctgctat,<br/> gttattaatagtcggcgatc,<br/> aatatgattgcacatcgccg,<br/> gtccaaaagcatcaggctta,<br/> aagcattcttggtttctcta,<br/> acttggtgctattagctgga,<br/> tttatctcatccggtgtatt,<br/> gggagttcgattgattccaa,<br/> gagtgacatgtcaacgaga,<br/> attacaacaagtccttgat,<br/> ccttcagagacagctagata,<br/> tgccgctaattggtttcaatg,<br/> gcccaactattaaaatgtcc,<br/> cgtgtaagctgcaagccaaa,<br/> ctcgagctgaagttttagt,<br/> ggcagtatcttcttcaaaa,<br/> tcgaatgtaaaccgctcctc,<br/> attggtttttcctcaaccat,<br/> gtgtattactggtaatggac,<br/> aacaccagacatcggttttt,</p>                                                             | <p>cattccagccaagttctaaa,<br/> agatactttaaagctcccca,<br/> caatcgtcggtaatgtgtcc,<br/> tgcaatgcttggtcacagaa,<br/> gggaaacatttgtatgtgtg,<br/> tgacgctatatcggcatttg,<br/> ttgcatagaaagcagagcct,<br/> ttgtctcaccggttttcatta,<br/> aatttttgccgtctgttcat,<br/> agcgtcgaatttcttgaagt,<br/> ccacgtcttaagtcacgtaa,<br/> atataccttaagtcogaact,<br/> ttaaccattgtaatggcacc,<br/> atgtattaagtctctagccc,<br/> taatattggagggcggagtg,<br/> gctgtaacaaaatccagttgg,<br/> tcccaagagagttcatcaat,<br/> ttcccttattatacagagctg,<br/> gccaccctccaaaaacaaac,<br/> atcggtagtggtatcctgaag,<br/> taggttttctactggcttaa,<br/> ataatatgccccgacactggt,</p>                                                |

|                         |             |                                                                                                                                                                                                                                                                                                                                                                                                                                                                                                                                                                                                                    |                                                                                                                                                                                                                                                                                                                                                                                                                                                                                                                                                                                                                   |
|-------------------------|-------------|--------------------------------------------------------------------------------------------------------------------------------------------------------------------------------------------------------------------------------------------------------------------------------------------------------------------------------------------------------------------------------------------------------------------------------------------------------------------------------------------------------------------------------------------------------------------------------------------------------------------|-------------------------------------------------------------------------------------------------------------------------------------------------------------------------------------------------------------------------------------------------------------------------------------------------------------------------------------------------------------------------------------------------------------------------------------------------------------------------------------------------------------------------------------------------------------------------------------------------------------------|
|                         |             | aatgatcctgacctaacggg,<br>agtagtcagccttttcatta,                                                                                                                                                                                                                                                                                                                                                                                                                                                                                                                                                                     | ctttaagtccacgggtatta,<br>taaaagtgcagtagcctcgct                                                                                                                                                                                                                                                                                                                                                                                                                                                                                                                                                                    |
| <i>kl-3</i> , Exon 1    | Quasar® 670 | taacattcctttctggatcc,<br>gcagcacgctttaacatggt,<br>tatcgtcttctttgttggtc,<br>caggcttgaaatccggttgt,<br>ataccaacaatctgcaca,<br>ttgctttcatccacaatacc,<br>gggacctttttcctcaaata,<br>cggaatcagttggatatacct,<br>agagcgttgaatttcagtggt,<br>gtcgatataacaacagtcac,<br>aaatattgccacctcatcac,<br>cggctttaaaccgtgatcca,<br>tgagtttgctcttttctgct,<br>cctttaaatagttcatgcga,<br>gtatTTTTgaactggcttca,<br>gccattgctcaaaataacgt,<br>gtatTTTgtttccctctact,<br>ccaattgaccaacatttgca,<br>gtaacaaactccggttatggt,<br>agataatgtcaagcaatcct                                                                                                   | cgcgaaacgccaaagagttt,<br>ttggctacttacactagggtc,<br>cctcatttctcgaagtaact,<br>aaacataccgctgggttggg,<br>gttactatttctcaggatc,<br>accatttacattctcaacat,<br>cgttacttatcattatggcc,<br>tttaagcttttctggtgagc,<br>actagatccgacctcaaaca,<br>accgaacggttatcaatcga,<br>aagcaagagtttctgctcttc,<br>caaattcgggtcacagcttct,<br>acagttgcttcagatgattt,<br>tttgccatctcacaagtaat,<br>caaccagtcgaactcgtgta,<br>gtataccttgaatttgcga,<br>ctacatcgggtgtatctctt,<br>tatactcggccaacatacgc,<br>gtggttattaaatgctcggg,                                                                                                                          |
| <i>kl-3</i> , Exon 14   | Quasar® 570 | gtactttgacatagccatgg,<br>tgatatttagcctcttgcac,<br>cgttttcttttgttgagcgt,<br>aaccaccaataagagcgggt,<br>cggtcgggtctcacttttaa,<br>tcttgattaaatggtcccgt,<br>ttgacagttcatctgttgggt,<br>taatcgggaattcccagtgta,<br>aaggttgtccaagcaaggat,<br>gattgggtagctttgttgta,<br>ccacgcattgtcacagtaaa,<br>tttcatgtttccagtcacag,<br>cctcaatcactgtaacgtcg,<br>cagcgtttatTTTTgcttct,<br>gcatcaaagcgtcaaggaa,<br>ttaactcaagctggcgatca,<br>caccgaaacggaacaggagg,<br>ccatacaccacgaacgaaca,<br>aatcattggcataagttccc,<br>cttgGCCatagaaatagga,<br>tcctaagtgcagttttgca,<br>agcaggtggttcattagtat,<br>tggagattgCGAatagcca,<br>tcctgctccttaaaactgta, | aagatttgcctttaagggca,<br>ctgcttctttagatcactt,<br>ttttggcctcgtctaatac,<br>ttcagtcctcaggtttttt,<br>ggagaataacatctccgacc,<br>atgttccactcaccaatttg,<br>ttttaatccacacttttccc,<br>taactcctctgcaacatctt,<br>tccaatccacttctttatca,<br>cgcgcaaatatttcaggtgt,<br>gaaccggttcatcttctaata,<br>ttccttctgtagtggaacaac,<br>tccttaacttcaatggcaggt,<br>aactacctctttagcaaac,<br>tcctctagattttagcagat,<br>cgcaccgcttttataaata,<br>tataccacgtaaaccaagcc,<br>agtttagtactactggctcg,<br>agctcatttttttggcgag,<br>cgtcttctaggcaggataat,<br>actgtaagctctaccatgta,<br>tttttagtccagcagctatt,<br>tgcataaccagtcggatgaat,<br>cgtttgccatgtcatcaata |
| <i>kl-5</i> , Exons 1-6 | Quasar® 570 | cttcttttcttttctgctcag,<br>ttgtcttgggttaggtagttc,<br>cctaaactcgttgggtggtta,<br>ccaccggaattgattgtgaa,<br>agcaactttataaccgtggtc,<br>atTTGctaattgggttcggta,<br>tctgtcttcatatcgtttgc,<br>aacgagacctttcatctggg,<br>gcttcataagagggttaacc,<br>tttacgaggtcttcaacgga,                                                                                                                                                                                                                                                                                                                                                        | aaaaactccggacgggttgtc,<br>ccacttatccagcttaagac,<br>atacgtttcttgttgggatt,<br>ctggaaagctgtaggatgga,<br>gaagtgggtgtaagtaccga,<br>atcccacttgatttactgtg,<br>tccatttccgatttcttgag,<br>catgacttctgctcatgcaaa,<br>caagccactttacaaccata,<br>tgctctggtagtggaat,                                                                                                                                                                                                                                                                                                                                                             |



|                               |             |                                                                                                                                                                                                                                                                                                                                                                                                                                                                                                                                                                                                                                                                         |                                                                                                                                                                                                                                                                                                                                                                                                                                                                                                                                                                                                                                                                                  |
|-------------------------------|-------------|-------------------------------------------------------------------------------------------------------------------------------------------------------------------------------------------------------------------------------------------------------------------------------------------------------------------------------------------------------------------------------------------------------------------------------------------------------------------------------------------------------------------------------------------------------------------------------------------------------------------------------------------------------------------------|----------------------------------------------------------------------------------------------------------------------------------------------------------------------------------------------------------------------------------------------------------------------------------------------------------------------------------------------------------------------------------------------------------------------------------------------------------------------------------------------------------------------------------------------------------------------------------------------------------------------------------------------------------------------------------|
|                               |             | <p>caagttctcaagggtttcca,<br/> tctgcgataagaatgctcga,<br/> gtccatatcgtttgttcaa,<br/> cactaatccaattgtcagca,<br/> gttctgttgacacagtcgat,<br/> ttataggcttcgtcgacatc,<br/> cagtcctgcgagttaaatgt,<br/> tcttttagctcttccaatcg,<br/> aagggcgaaagttatctgcc,<br/> aatatgttccactcacggg,<br/> tggccttgaagcttaaacga,<br/> atgtgtgtcttcaagacctt,<br/> gggttcgacatgttttttga,<br/> taacgcacatgatctcttcc,</p>                                                                                                                                                                                                                                                                               | <p>agtctttatacgcctatctc,<br/> acttagttatgtctctagcc,<br/> gtcgtatatctgatcgggtc,<br/> tgaaaataccgcgagtgacc,<br/> ggaatatggagtcctgggtct,<br/> tgtaatactctaggtgctgc,<br/> atcgtccgaatatttcatcc,<br/> ccccataacaatttttcca,<br/> tgctgttgtaactcttcaaga,<br/> acagagaattttctgctgcc,<br/> tgaaacgataccatgctgctc,<br/> gcaagaagtaaggagcctg,<br/> atcatccacaatgacatgca,<br/> cgagcgcgtaaaaacgttt</p>                                                                                                                                                                                                                                                                                       |
| <i>kl-5</i> , Exons 16-17     | Fluorescein | <p>ttgtgggtccgaatttcctac,<br/> tgatattgtcaaatcgccca,<br/> caagggtactctggtattggc,<br/> ccagtcgtctgtaatgtgac,<br/> agctctggctgcataaattc,<br/> atttaagtattcctggagcc,<br/> gagatggactttcagacgga,<br/> cgtagtttaggaaccaatct,<br/> tctcggctgcaactcgaaaa,<br/> gtttttataatgtcttctc,<br/> cgcgaccattagttctaaa,<br/> cgctcacactcttgaaatgc,<br/> aggtcaagctcattcagaga,<br/> cattaaatcctccataact,<br/> aaccaggattgtagccctag,<br/> aggcatgcgaaagtcggcaa,<br/> aggagcgaactgaggattaaa,<br/> gacacattctatcgagaggc,<br/> ttgatataggaccctctcg,<br/> aatgggtcccattttcatgt,<br/> agaacaggcatagcaggaaa,<br/> gacatttttaatctctgct,<br/> caaacgaaggtgggtcctcg,<br/> ctagagtccacttacttgct,</p> | <p>taaacgggtagctacgggttc,<br/> ccaggtaattgtacagcaca,<br/> ccatacataatctctccgaa,<br/> gataagttcggcataaagcgg,<br/> aaacctggcaataactctag,<br/> atgtaattgtggtagccagt,<br/> gcatttgaatgaaggccgta,<br/> attcgggaagagtcggtcaga,<br/> aaactgtctcaccaccacta,<br/> aatgggtgtgggagttttgct,<br/> atgtatggacttcgggtcttc,<br/> gcttcaattcagtcataaga,<br/> agtcattctcctttaaggc,<br/> gcaactgggtccatgtaaaga,<br/> cagccgcaacattaaatcgg,<br/> atcctgccaaaccaaattgat,<br/> cgtctgttgcatgatagctg,<br/> ttccacttttgggtgacatc,<br/> tgctccctccatgaaaagac,<br/> gttccttttaaaaaggcgtct,<br/> cttgggttactgcctttatg,<br/> cggattttgtaaaactgggca,<br/> ctctcggcttttcaagttaa,<br/> tgcaagagaagacaaacccc</p> |
| <i>ks-1 (ORY)</i> , All exons | Quasar® 670 | <p>tttttggtcttcttctgtc,<br/> cgtttaattcgcgatgcttc,<br/> tccgatgttgaagtcagttc,<br/> tgatgcatctgattctttcc,<br/> cagttgtaccactatttcgg,<br/> attcaacgttttaggcgttcg,<br/> tttccatgtgcttctttttg,<br/> agtttacgtgtcgtttctga,<br/> gccttaactgctttatcatt,<br/> ttgtacattcttgttgcgc,<br/> gacgaatatcatccgttcgg,<br/> atgttttaagtcggccatag,<br/> cgtcttcagagagatttggg,<br/> acggactccaactgtttttt,<br/> ttttacttcgtttgcgctta,<br/> tttctctcatatccttacgt,<br/> aacaatctcgtcattccgctc,<br/> aaggcattcactttcagtggt,<br/> tcttcagtttagagctcgtat,</p>                                                                                                                                    | <p>aaaagttgaggctccgagtt,<br/> cttcatctacataccgacga,<br/> cccccaacaaatctttaagt,<br/> tcttgactaactgttctcgt,<br/> ttagctcgagaagccatttt,<br/> ccattgtcttcatcaaagct,<br/> ctctattcgcaatatccagt,<br/> gcattgocctattttaatgcg,<br/> aagcctgctcgttaattgag,<br/> catccttctccagagaatta,<br/> cacgttgcaatgtctctttg,<br/> tcttctctcgtctttggattt,<br/> tcgtgtaacttttccggtgag,<br/> cgctgaagcatcattttctc,<br/> gccactaagttttctttggt,<br/> caatccgactaggttacggt,<br/> gggcatttttgtaaaactgga,<br/> ctcatgtcagcagtaactttt,<br/> caacgatgtactcctgtagg,</p>                                                                                                                                          |

|                           |             |                                                                                                                                                                                                                                                                                                                                                                                                                                                                                                                                                                                                                                             |                                                                                                                                                                                                                                                                                                                                                                                                                                                                                                                                                                                                                        |
|---------------------------|-------------|---------------------------------------------------------------------------------------------------------------------------------------------------------------------------------------------------------------------------------------------------------------------------------------------------------------------------------------------------------------------------------------------------------------------------------------------------------------------------------------------------------------------------------------------------------------------------------------------------------------------------------------------|------------------------------------------------------------------------------------------------------------------------------------------------------------------------------------------------------------------------------------------------------------------------------------------------------------------------------------------------------------------------------------------------------------------------------------------------------------------------------------------------------------------------------------------------------------------------------------------------------------------------|
|                           |             | aatttcttaggatcttcgcc,<br>agcctcacacagtttatttt,<br>taatgaacgctctgctgcta,<br>aattgacagctctccgattt,<br>atccacattccatataactct,                                                                                                                                                                                                                                                                                                                                                                                                                                                                                                                  | tattgactgcttttagggagc,<br>gcatatgagatagcatcctt,<br>gtcttgatttaagttccacc,<br>tatttcgtttttcccatctg,<br>atatccggttaacttcgcaca                                                                                                                                                                                                                                                                                                                                                                                                                                                                                             |
| <i>ks-2 (CCY), Exon 1</i> | Quasar® 570 | tctttttgtgtggagaacgc,<br>attaacgcaaactccagtgc,<br>ttcttcgttttctgaccatg,<br>tggattgttacatgccacta,<br>cagcaggagattactaccat,<br>gtaaccaatcgattgcgta,<br>agcttcatgtctgattcagg,<br>gcgttgatttataatcctct,<br>ccatttagctttacttgag,<br>ttcttttagttccttctctt,<br>cctcaagtaaactcctgggtt,<br>cggcatcgaatggattgtt,<br>gaaggactcaacgtctgtg,<br>gccgaagtagcgataattct,<br>ttctacacatttgtgcgac,<br>gcattattcatatagacacc,<br>actttttacgcagagcatct,<br>tggtctagggcattaagctt,<br>attgtcttcaagatcctcag,<br>atccatttctctgctgaatat,                                                                                                                               | gtaagctcataactttcgt,<br>cgatcgtcgattgaagatgg,<br>tcggcaacaaaacgcgattt,<br>ttcgtttccatgctttacaa,<br>cgcatttattaagctgtct,<br>gctgggtgttaaggatgtt,<br>cgcggtatccatttttatcg,<br>cctagcattatctcgattgt,<br>tcattctttgagcttatcca,<br>ccatgcatcgatagttctt,<br>gctttaggtaagcattttcc,<br>tttgctcgggattaatttct,<br>gccatttcggttaatttttcg,<br>cttataagcatatcttcggt,<br>cttgaaagcttcggtgact,<br>ttcttgtagaattctctgt,<br>caagcgttccagattttta,<br>aatgttttctgcctcatttg,<br>gtttatgtattgggtctgct,<br>agtttctctaactcctttcgc                                                                                                             |
| <i>Ppr-Y, All exons</i>   | Quasar® 570 | atattttgatcgtcttccat,<br>tattccaggttcaatatctgg,<br>caccacgatgaacgtgtttta,<br>atgtgtccaataacaacaggc,<br>atccataagtgatcaatacgt,<br>aatggctctctatttgttgca,<br>gacagaacttccaaatttact,<br>agcatgggtaacatcgata,<br>tccttcaactgtgtcaattaa,<br>gataggattaccttccaaatt,<br>cggagttcactcttaataaaa,<br>tcttcaatttcccgaatctcc,<br>tctgattgttcacgttcaaga,<br>tgatgaccatccaaatgttca,<br>caacaagcatcagcacacgac,<br>gtaaatttcttgcgtaagttc,<br>tctcgaatttcttcatcgcgc,<br>acataagctccgcaatttttc,<br>tcgagtcaatatttcgggtcat,<br>tcggagttcaataggaacgtc,<br>ctcgctcatctaatcgcaaag,<br>ctggttagttggctctatcata,<br>catcggctcatcatttctacaa,<br>acataatcttcggctatcagc | aataacttcatccacaagggg,<br>agctttcaatcaaggaacggg,<br>cagttgatgtaaacgtcttcc,<br>ttaaactccaaacgcattgtt,<br>taaggcaaagcttgggtcagat,<br>gggtgtcaagattttcgatctt,<br>ctcaatagcttcaattttgtt,<br>tatttccaaaggctgataatta,<br>tcataaaccgaaatcgttca,<br>ctgatatgtactttaacaggc,<br>agtataaattacagggtctctg,<br>cttgatctctcttcttctgtt,<br>aacttgagggttaatcgttttg,<br>cacgccaagtgaggtcaaca,<br>atctcttatcgtatttcgctg,<br>gtaaacttttctaagccaagt,<br>tatttgaagttcttcttggcc,<br>atgcttgagattgttctacaa,<br>gtcttgaagtgcaaatctcgt,<br>ttaaagtggcgtcacgggtcat,<br>gtctacaaattcctttgttcg,<br>aatttttgaccgatgtcgttc,<br>cttacatcgtgtggtaaggat, |

| Primer Name   | 5'-Sequence-3'          |
|---------------|-------------------------|
| Gapdh-qF      | TAAATTCGACTCGACTCACGGT  |
| Gapdh-qR      | CTCCACCACATACTCGGCTC    |
| kl-3_exon1_qF | CCCGAGCATTTAATAACCACAAG |
| kl-3_exon2_qR | AACGGACATTATCCTTAGCTTCA |

|                |                         |
|----------------|-------------------------|
| kl-3_exon15_qF | GCCACGAGCTCGATGAATA     |
| kl-3_exon16_qR | AGTACCTTCAACGGCAAGAA    |
| kl-5_exon1_qF  | ATGCGTCTTAAGCTGGATAAGT  |
| kl-5_exon2_qR  | TGTCCACCGGAATTGATTGT    |
| kl-5_exon16_qF | GCCTCTCGATAGAATGTGTCTT  |
| kl-5_exon17_qR | TTTCATGTCCCATCGTGCT     |
| kl-2_exon1_qF  | AATGACAAGACCCTTACCAGTC  |
| kl-2_exon2_qR  | TTTGTTGAACATCCACTTGATCC |
| kl-2_exon5_qF  | CGTCGGACTTTGCCCTTAAT    |
| kl-2_exon6_qR  | GCTCCAAAGTGAAGTTCTTCGAG |

752

753

## 754 References

- 755 Anderson, P., and N. Kedersha. 2009. RNA granules: post-transcriptional and epigenetic  
756 modulators of gene expression. *Nat Rev Mol Cell Biol.* 10:430-436.
- 757 Avidor-Reiss, T., A. Ha, and M.L. Basiri. 2017. Transition Zone Migration: A Mechanism for  
758 Cytoplasmic Ciliogenesis and Postaxonemal Centriole Elongation. *Cold Spring Harb*  
759 *Perspect Biol.* 9.
- 760 Avidor-Reiss, T., and M.R. Leroux. 2015. Shared and Distinct Mechanisms of  
761 Compartmentalized and Cytosolic Ciliogenesis. *Curr Biol.* 25:R1143-1150.
- 762 Baker, J.D., S. Adhikarakunnathu, and M.J. Kernan. 2004. Mechanosensory-defective, male-  
763 sterile unc mutants identify a novel basal body protein required for ciliogenesis in  
764 *Drosophila*. *Development.* 131:3411-3422.
- 765 Barckmann, B., X. Chen, S. Kaiser, S. Jayaramaiah-Raja, C. Rathke, C. Dottermusch-Heidel, M.T.  
766 Fuller, and R. Renkawitz-Pohl. 2013. Three levels of regulation lead to protamine and  
767 Mst77F expression in *Drosophila*. *Dev Biol.* 377:33-45.
- 768 Basiri, M.L., A. Ha, A. Chadha, N.M. Clark, A. Polyanovsky, B. Cook, and T. Avidor-Reiss. 2014.  
769 A migrating ciliary gate compartmentalizes the site of axoneme assembly in  
770 *Drosophila* spermatids. *Curr Biol.* 24:2622-2631.
- 771 Bley, N., M. Lederer, B. Pfalz, C. Reinke, T. Fuchs, M. Glass, B. Moller, and S. Huttelmaier. 2015.  
772 Stress granules are dispensable for mRNA stabilization during cellular stress. *Nucleic*  
773 *Acids Res.* 43:e26.
- 774 Boisvert, F.M., S. van Koningsbruggen, J. Navascues, and A.I. Lamond. 2007. The  
775 multifunctional nucleolus. *Nat Rev Mol Cell Biol.* 8:574-585.
- 776 Breslow, D.K., E.F. Koslover, F. Seydel, A.J. Spakowitz, and M.V. Nachury. 2013. An in vitro  
777 assay for entry into cilia reveals unique properties of the soluble diffusion barrier. *J*  
778 *Cell Biol.* 203:129-147.
- 779 Briggs, L.J., J.A. Davidge, B. Wickstead, M.L. Ginger, and K. Gull. 2004. More than one way to  
780 build a flagellum: comparative genomics of parasitic protozoa. *Curr Biol.* 14:R611-  
781 612.
- 782 Buchan, J.R. 2014. mRNP granules. Assembly, function, and connections with disease. *RNA*  
783 *Biol.* 11:1019-1030.

- 784 Carvalho, A.B., B.A. Dobo, M.D. Vibranovski, and A.G. Clark. 2001. Identification of five new  
785 genes on the Y chromosome of *Drosophila melanogaster*. *Proc Natl Acad Sci U S A*.  
786 98:13225-13230.
- 787 Carvalho, A.B., B.P. Lazzaro, and A.G. Clark. 2000. Y chromosomal fertility factors kl-2 and kl-  
788 3 of *Drosophila melanogaster* encode dynein heavy chain polypeptides. *Proc Natl*  
789 *Acad Sci U S A*. 97:13239-13244.
- 790 Caudron, F., and Y. Barral. 2009. Septins and the lateral compartmentalization of eukaryotic  
791 membranes. *Dev Cell*. 16:493-506.
- 792 Chen, D., and D.M. McKearin. 2003. A discrete transcriptional silencer in the bam gene  
793 determines asymmetric division of the *Drosophila* germline stem cell. *Development*.  
794 130:1159-1170.
- 795 Dafinger, C., M.M. Rinschen, L. Borgal, C. Ehrenberg, S.G. Basten, M. Franke, M. Hohne, M.  
796 Rauh, H. Gobel, W. Bloch, F.T. Wunderlich, D.J.M. Peters, D. Tasche, T. Mishra, S.  
797 Habbig, J. Dotsch, R.U. Muller, J.C. Bruning, T. Persigehl, R.H. Giles, T. Benzing, B.  
798 Schermer, and M.C. Liebau. 2018. Targeted deletion of the AAA-ATPase Ruvbl1 in  
799 mice disrupts ciliary integrity and causes renal disease and hydrocephalus. *Exp Mol*  
800 *Med*. 50:75.
- 801 Dawson, S.C., and S.A. House. 2010. Life with eight flagella: flagellar assembly and division in  
802 *Giardia*. *Curr Opin Microbiol*. 13:480-490.
- 803 Desai, P.B., A.B. Dean, and D.R. Mitchell. 2018. Cytoplasmic preassembly and trafficking of  
804 axonemal dyneins. *In Dyneins*. 140-161.
- 805 Diop, S.B., K. Bertaux, D. Vasanthi, A. Sarkeshik, B. Goirand, D. Aragnol, N.S. Tolwinski, M.D.  
806 Cole, J. Pradel, J.R. Yates, 3rd, R.K. Mishra, Y. Graba, and A.J. Saurin. 2008. Reptin and  
807 Pontin function antagonistically with PcG and TrxG complexes to mediate Hox gene  
808 control. *EMBO Rep*. 9:260-266.
- 809 Fabczak, H., and A. Osinka. 2019. Role of the Novel Hsp90 Co-Chaperones in Dynein Arms'  
810 Preassembly. *Int J Mol Sci*. 20.
- 811 Fabian, L., and J.A. Brill. 2012. *Drosophila* spermiogenesis: Big things come from little  
812 packages. *Spermatogenesis*. 2:197-212.
- 813 Fatima, R. 2011. *Drosophila* Dynein intermediate chain gene, Dic61B, is required for  
814 spermatogenesis. *PLoS One*. 6:e27822.
- 815 Fawcett, D.W., E.M. Eddy, and D.M. Phillips. 1970. Observations on the fine structure and  
816 relationships of the chromatoid body in mammalian spermatogenesis. *Biol Reprod*.  
817 2:129-153.
- 818 Fingerhut, J.M., J.V. Moran, and Y.M. Yamashita. 2019. Satellite DNA-containing gigantic  
819 introns in a unique gene expression program during *Drosophila* spermatogenesis.  
820 *PLoS Genet*. 15:e1008028.
- 821 Fowkes, M.E., and D.R. Mitchell. 1998. The role of preassembled cytoplasmic complexes in  
822 assembly of flagellar dynein subunits. *Mol Biol Cell*. 9:2337-2347.
- 823 Fuller, M.T. 1993. Spermatogenesis. *In The Development of Drosophila Melanogaster*. Vol. 1.  
824 M. Bate, Arias, A.M., editor. Cold Spring Harbor Laboratory Press, New York. 71-148.
- 825 Glock, C., M. Heumuller, and E.M. Schuman. 2017. mRNA transport & local translation in  
826 neurons. *Curr Opin Neurobiol*. 45:169-177.
- 827 Goldstein, L.S., R.W. Hardy, and D.L. Lindsley. 1982. Structural genes on the Y chromosome  
828 of *Drosophila melanogaster*. *Proc Natl Acad Sci U S A*. 79:7405-7409.

- 829 Gorynia, S., T.M. Bandejas, F.G. Pinho, C.E. McVey, C. Vonrhein, A. Round, D.I. Svergun, P.  
830 Donner, P.M. Matias, and M.A. Carrondo. 2011. Structural and functional insights into  
831 a dodecameric molecular machine - the RuvBL1/RuvBL2 complex. *J Struct Biol.*  
832 176:279-291.
- 833 Gottardo, M., G. Callaini, and M.G. Riparbelli. 2013. The cilium-like region of the *Drosophila*  
834 spermatocyte: an emerging flagellum? *J Cell Sci.* 126:5441-5452.
- 835 Hales, K.G., and M.T. Fuller. 1997. Developmentally regulated mitochondrial fusion mediated  
836 by a conserved, novel, predicted GTPase. *Cell.* 90:121-129.
- 837 Han, Y.G., B.H. Kwok, and M.J. Kernan. 2003. Intraflagellar transport is required in *Drosophila*  
838 to differentiate sensory cilia but not sperm. *Curr Biol.* 13:1679-1686.
- 839 Hardy, R.W., K.T. Tokuyasu, and D.L. Lindsley. 1981. Analysis of spermatogenesis in  
840 *Drosophila melanogaster* bearing deletions for Y-chromosome fertility genes.  
841 *Chromosoma.* 83:593-617.
- 842 Hime, G.R., J.A. Brill, and M.T. Fuller. 1996. Assembly of ring canals in the male germ line from  
843 structural components of the contractile ring. *J Cell Sci.* 109 ( Pt 12):2779-2788.
- 844 Hoeng, J.C., S.C. Dawson, S.A. House, M.S. Sagolla, J.K. Pham, J.J. Mancuso, J. Lowe, and W.Z.  
845 Cande. 2008. High-resolution crystal structure and in vivo function of a kinesin-2  
846 homologue in *Giardia intestinalis*. *Mol Biol Cell.* 19:3124-3137.
- 847 Huen, J., Y. Kakihara, F. Ugwu, K.L. Cheung, J. Ortega, and W.A. Houry. 2010. Rvb1-Rvb2:  
848 essential ATP-dependent helicases for critical complexes. *Biochem Cell Biol.* 88:29-40.
- 849 Huizar, R.L., C. Lee, A.A. Boulgakov, A. Horani, F. Tu, E.M. Marcotte, S.L. Brody, and J.B.  
850 Wallingford. 2018. A liquid-like organelle at the root of motile ciliopathy. *Elife.* 7.
- 851 Ishikawa, H., and W.F. Marshall. 2011. Ciliogenesis: building the cell's antenna. *Nat Rev Mol*  
852 *Cell Biol.* 12:222-234.
- 853 Jain, S., J.R. Wheeler, R.W. Walters, A. Agrawal, A. Barsic, and R. Parker. 2016. ATPase-  
854 Modulated Stress Granules Contain a Diverse Proteome and Substructure. *Cell.*  
855 164:487-498.
- 856 Kakihara, Y., and M. Saeki. 2014. The R2TP chaperone complex: its involvement in snoRNP  
857 assembly and tumorigenesis. *Biomol Concepts.* 5:513-520.
- 858 Kee, H.L., J.F. Dishinger, T.L. Blasius, C.J. Liu, B. Margolis, and K.J. Verhey. 2012. A size-  
859 exclusion permeability barrier and nucleoporins characterize a ciliary pore complex  
860 that regulates transport into cilia. *Nat Cell Biol.* 14:431-437.
- 861 Kwitny, S., A.V. Klaus, and G.R. Hunnicutt. 2010. The annulus of the mouse sperm tail is  
862 required to establish a membrane diffusion barrier that is engaged during the late  
863 steps of spermiogenesis. *Biol Reprod.* 82:669-678.
- 864 Lee, C.S., A. Putnam, T. Lu, S. He, J.P.T. Ouyang, and G. Seydoux. 2020. Recruitment of mRNAs  
865 to P granules by condensation with intrinsically-disordered proteins. *Elife.* 9.
- 866 Li, Y., L. Zhao, S. Yuan, J. Zhang, and Z. Sun. 2017. Axonemal dynein assembly requires the  
867 R2TP complex component Pontin. *Development.* 144:4684-4693.
- 868 Lin, Y.C., P. Niewiadomski, B. Lin, H. Nakamura, S.C. Phua, J. Jiao, A. Levchenko, T. Inoue, R.  
869 Rohatgi, and T. Inoue. 2013. Chemically inducible diffusion trap at cilia reveals  
870 molecular sieve-like barrier. *Nat Chem Biol.* 9:437-443.
- 871 Liu, G., L. Wang, and J. Pan. 2019. *Chlamydomonas* WDR92 in association with R2TP-like  
872 complex and multiple DNAAFs to regulate ciliary dynein preassembly. *J Mol Cell Biol.*  
873 11:770-780.

- 874 Mao, Y.Q., and W.A. Houry. 2017. The Role of Pontin and Reptin in Cellular Physiology and  
875 Cancer Etiology. *Front Mol Biosci.* 4:58.
- 876 Medioni, C., K. Mowry, and F. Besse. 2012. Principles and roles of mRNA localization in animal  
877 development. *Development.* 139:3263-3276.
- 878 Muller, H.A. 2008. Immunolabeling of embryos. *Methods Mol Biol.* 420:207-218.
- 879 Noguchi, T., M. Koizumi, and S. Hayashi. 2011. Sustained elongation of sperm tail promoted  
880 by local remodeling of giant mitochondria in *Drosophila*. *Curr Biol.* 21:805-814.
- 881 Olivieri, G., and A. Olivieri. 1965. Autoradiographic study of nucleic acid synthesis during  
882 spermatogenesis in *Drosophila melanogaster*. *Mutat Res.* 2:366-380.
- 883 Phillips, D.M. 1970. Insect sperm: their structure and morphogenesis. *J Cell Biol.* 44:243-277.
- 884 Puchades, C., C.R. Sandate, and G.C. Lander. 2020. The molecular principles governing the  
885 activity and functional diversity of AAA+ proteins. *Nat Rev Mol Cell Biol.* 21:43-58.
- 886 Rebollo, E., S. Llamazares, J. Reina, and C. Gonzalez. 2004. Contribution of noncentrosomal  
887 microtubules to spindle assembly in *Drosophila* spermatocytes. *PLoS Biol.* 2:E8.
- 888 Reiter, J.F., O.E. Blacque, and M.R. Leroux. 2012. The base of the cilium: roles for transition  
889 fibres and the transition zone in ciliary formation, maintenance and  
890 compartmentalization. *EMBO Rep.* 13:608-618.
- 891 Riparbelli, M.G., G. Callaini, and T.L. Megraw. 2012. Assembly and persistence of primary cilia  
892 in dividing *Drosophila* spermatocytes. *Dev Cell.* 23:425-432.
- 893 Rivera-Calzada, A., M. Pal, H. Munoz-Hernandez, J.R. Luque-Ortega, D. Gil-Carton, G.  
894 Degliesposti, J.M. Skehel, C. Prodromou, L.H. Pearl, and O. Llorca. 2017. The Structure  
895 of the R2TP Complex Defines a Platform for Recruiting Diverse Client Proteins to the  
896 HSP90 Molecular Chaperone System. *Structure.* 25:1145-1152 e1144.
- 897 Robinson, S.W., P. Herzyk, J.A. Dow, and D.P. Leader. 2013. FlyAtlas: database of gene  
898 expression in the tissues of *Drosophila melanogaster*. *Nucleic Acids Res.* 41:D744-750.
- 899 Rosenbaum, J.L., and G.B. Witman. 2002. Intraflagellar transport. *Nat Rev Mol Cell Biol.* 3:813-  
900 825.
- 901 Sarpal, R., S.V. Todi, E. Sivan-Loukianova, S. Shirolikar, N. Subramanian, E.C. Raff, J.W.  
902 Erickson, K. Ray, and D.F. Eberl. 2003. *Drosophila* KAP interacts with the kinesin II  
903 motor subunit KLP64D to assemble chordotonal sensory cilia, but not sperm tails.  
904 *Curr Biol.* 13:1687-1696.
- 905 Sinden, R.E., E.U. Canning, and B. Spain. 1976. Gametogenesis and fertilization in *Plasmodium*  
906 *yoelii nigeriensis*: a transmission electron microscope study. *Proc R Soc Lond B Biol*  
907 *Sci.* 193:55-76.
- 908 Sinden, R.E., A. Talman, S.R. Marques, M.N. Wass, and M.J. Sternberg. 2010. The flagellum in  
909 malarial parasites. *Curr Opin Microbiol.* 13:491-500.
- 910 Stolc, V., M.P. Samanta, W. Tongprasit, and W.F. Marshall. 2005. Genome-wide transcriptional  
911 analysis of flagellar regeneration in *Chlamydomonas reinhardtii* identifies orthologs  
912 of ciliary disease genes. *Proc Natl Acad Sci U S A.* 102:3703-3707.
- 913 Tammana, D., and T.V.S. Tammana. 2017. Human DNA helicase, RuvBL1 and its  
914 *Chlamydomonas* homologue, CrRuvBL1 plays an important role in ciliogenesis.  
915 *Cytoskeleton (Hoboken).* 74:251-259.
- 916 Tate, A.D. 1971. Cytodifferentiation during spermatogenesis in *Drosophila melanogaster*:  
917 An electron microscope study. Vol. Ph.D., Rijksuniversiteit, Leiden.
- 918 Tokuyasu, K.T. 1975. Dynamics of spermiogenesis in *Drosophila melanogaster*. VI.  
919 Significance of "onion" nebenkern formation. *J Ultrastruct Res.* 53:93-112.

- 920 Trcek, T., M. Grosch, A. York, H. Shroff, T. Lionnet, and R. Lehmann. 2015. *Drosophila* germ  
921 granules are structured and contain homotypic mRNA clusters. *Nat Commun.* 6:7962.
- 922 Venteicher, A.S., Z. Meng, P.J. Mason, T.D. Veenstra, and S.E. Artandi. 2008. Identification of  
923 ATPases pontin and reptin as telomerase components essential for holoenzyme  
924 assembly. *Cell.* 132:945-957.
- 925 Vieillard, J., M. Paschaki, J.L. Duteyrat, C. Augiere, E. Cortier, J.A. Lapart, J. Thomas, and B.  
926 Durand. 2016. Transition zone assembly and its contribution to axoneme formation  
927 in *Drosophila* male germ cells. *J Cell Biol.* 214:875-889.
- 928 Wang, J.T., J. Smith, B.C. Chen, H. Schmidt, D. Rasoloson, A. Paix, B.G. Lambrus, D. Calidas, E.  
929 Betzig, and G. Seydoux. 2014. Regulation of RNA granule dynamics by  
930 phosphorylation of serine-rich, intrinsically disordered proteins in *C. elegans*. *Elife.*  
931 3:e04591.
- 932 Wang, Y., R. Xu, Y. Cheng, H. Cao, Z. Wang, T. Zhu, J. Jiang, H. Zhang, C. Wang, L. Qi, M. Liu, X.  
933 Guo, J. Huang, and J. Sha. 2019. RSBP15 interacts with and stabilizes dRSPH3 during  
934 sperm axoneme assembly in *Drosophila*. *J Genet Genomics.* 46:281-290.
- 935 Wheway, G., L. Nazlamova, and J.T. Hancock. 2018. Signaling through the Primary Cilium.  
936 *Front Cell Dev Biol.* 6:8.
- 937 Yamaguchi, H., T. Oda, M. Kikkawa, and H. Takeda. 2018. Systematic studies of all PIH  
938 proteins in zebrafish reveal their distinct roles in axonemal dynein assembly. *Elife.* 7.
- 939 Zhao, L., S. Yuan, Y. Cao, S. Kallakuri, Y. Li, N. Kishimoto, L. DiBella, and Z. Sun. 2013.  
940 Reptin/Ruvbl2 is a Lrrc6/Seahorse interactor essential for cilia motility. *Proc Natl*  
941 *Acad Sci U S A.* 110:12697-12702.
- 942 Zur Lage, P., F.G. Newton, and A.P. Jarman. 2019. Survey of the Ciliary Motility Machinery of  
943 *Drosophila* Sperm and Ciliated Mechanosensory Neurons Reveals Unexpected Cell-  
944 Type Specific Variations: A Model for Motile Ciliopathies. *Front Genet.* 10:24.
- 945 Zur Lage, P., P. Stefanopoulou, K. Styczynska-Soczka, N. Quinn, G. Mali, A. von Kriegsheim, P.  
946 Mill, and A.P. Jarman. 2018. Ciliary dynein motor preassembly is regulated by Wdr92  
947 in association with HSP90 co-chaperone, R2TP. *J Cell Biol.* 217:2583-2598.
- 948
